# Supplementary material for: Evaluation of 2-( 1H -1,2,3-triazol-1-yl) acetic acid derivatives as potential human hypoxia-inducible factor (HIF) prolyl hydroxylase domain-2 (PHD2) inhibitors
Source: publisher site journal article supplement (doi:10.1515/pac-2024-0301), 2025-03-06
Supplement: Supplementary file 1 [file j_pac-2024-0301_suppl_001.docx]

Supplementary Information

**Evaluation of 2-(1H-1,2,3-triazol-1-yl)acetic acid derivatives as potential human hypoxia inducible factor (HIF) prolyl hydroxylase domain-2 (PHD2) inhibitors**

Abrar Mohammad Sayaf1*, June Sun Cheah1*, Abbas Khan2,4, Christopher J. Schofield3, Abdelali Agouni2, and Kar Kheng Yeoh1

✉ Kar Kheng Yeoh kkyeoh@usm.my

1. School of Chemical Sciences, Universiti Sains Malaysia, Penang 11800, Malaysia
2. Department of Pharmaceutical Sciences, College of Pharmacy, QU Health, Qatar University, P.O. Box 2713, Doha, Qatar.
3. Chemical Research Laboratory, Department of Chemistry, University of Oxford, OX1 3TA, United Kingdom.
4. School of Medical and Life Sciences, Sunway University, No. 5, Jalan Universiti,

Bandar Sunway, 47500 Selangor Darul Ehsan, Malaysia.

**Tables**

**Table 1:** Percentage yields, melting points and FT-IR spectral data--------------------2

**Table 2:** HRMS spectral data---------------------------------------------------------------- 2

**Table 3:** NMR spectral data-------------------------------------------------------------------3

**Figures**

**Figure 1 and 2:** FT-IR spectrum of selected compounds --------------------------------4

**Figure 3 and 4:** ESI-HRMS of selected compounds--------------------------------------5

**Figure 5 to 30:** NMR spectrum of selected compounds------------------------------6-18

**Tables**

**Table 1:** Percentage yields, melting points and FTIR spectral data of the triazole based compounds **1**-**14**

| Compounds | Yield (%) | M.P (°C) | FTIR  (ν, cm⁻¹) | N-H | O-H | C-H, sp² | C-H, Sp³ | C-H, Aldehyde | C=O | C=C,  Aromatic | C-N | C-O |
| --- | --- | --- | --- | --- | --- | --- | --- | --- | --- | --- | --- | --- |
| 1 | 33.7 | 177-181 | - | 3426 | 3159 | 2946 | - | - | 1710 | 1618/  1449 | 1390 | 1241 |
| 2 | 31.5 | - | - | 3415 | 3146 | 2954 | - | - | 1736 | 1636/  1455 | 1340 | 1226 |
| 3 | 26.3 | - | - | 3441 | 3147 | 2950 | - | - | 1736 | 1638/  1447 | 1385 | 1231 |
| 4 | 55.7 | 114-117 | - | 3414 | 3174 | 2902 | - | - | 1729 | 1617/  1472 | 1418 | 1226 |
| 5 | 32.6 | 125-128 | - | 3417 | 3168 | 3003 | - | - | 1730 | 1600/  1496 | 1342 | 1229 |
| 6 | 28.3 | 191-193 | - | 3226 | 3138 | 2938 | - | - | 1742 | 1618/  1474 | 1351 | 1269 |
| 7 | 57.8 | 233-234 | 3471 | 3471 | 3143 | 2938 | - | - | 1737 | 1628/  1465 | 1386 | 1303 |
| 8 | 24.2 | - | - | 3421 | 3143 | 2925 | - | - | 1740 | 1610/  1465 | 1382 | 1252 |
| 9 | 61.3 | 193-196 | - | 3415 | 3174 | 2925 | - | - | 1736 | 1609/  1494 | 1340 | 1218 |
| 10 | 27.1 | 176-177 | - | 3416 | 3145 | 2936 | 2845/  2754 | 1727/  1718 | 1601/  1438 | 1338 | 1225 |  |
| 11 | 63.8 | 211-213 | - | 3481 | 3149 | 2958 | - | - | 1726/  1715 | 1626/  1437 | 1398 | 1203 |
| 12 | 62.2 | 229-231 | - | 3458 | 3143 | 2947 | - | - | 1724/  1711 | 1625/  1435 | 1363 | 1224 |
| 13 | 64.5 | 218-220 | - | 3453 | 3141 | 2926 | - | - | 1731/  1716 | 1615/  1442 | 1363 | 1230 |
| 14 | 60.1 | 216-218 | - | 3416 | 3146 | 2961 | - | - | 1729/  1719 | 1611/1465 | 1359 | 1239 |

**Table 1** HRMS spectral data of the triazole based compounds

| Compound | HRMS | |
| --- | --- | --- |
|  | **Observed molar mass** | **Calculated molar mass (amu)** |
| 1 | (+ESI, m/z, amu): 310.1204 | 310.1204 |
| 2 | (+ESI, m/z, amu): 234.0869 | 233.0873 |
| 3 | (+ESI, m/z, amu): 248.0895 | 248.1030 |
| 4 | (+ESI, m/z, amu): 248.1018 | 248.1030 |
| 5 | (+ESI, m/z, amu): 234.0848 | 234.0873 |
| 6 | (+ESI, m/z, amu): 226.1190 | 226.1186 |
| 7 | (+ESI, m/z, amu): 225.1347 | 225.1346 |
| 8 | (+ESI, m/z, amu): 205.0457 | 205.0720 |
| 9 | (+ESI, m/z, amu): 234.0596 | 234.0873 |
| 10 | (-ESI, m/z, amu): 230.0596 | 232.0717 |
| 11 | (+ESI, m/z, amu): 287.0700 | 286.0775 |
| 12 | (+ESI, m/z, amu): 301.0931 | 301.0948 |
| 13 | (+ESI, m/z, amu): 315.1077 | 315.1088 |
| 14 | (+ESI, m/z, amu): 303.0716 | 303.0724 |

**Table 3:** 1H NMR spectral data of the triazole based compounds

| Compound | 1H NMR (δ, ppm) Triazolyl proton |
| --- | --- |
| 1 | 7.78 |
| 2 | 7.85 |
| 3 | 7.82 |
| 4 | 8.13 |
| 5 | 8.22 |
| 6 | 7.86 |
| 7 | 8.12 |
| 8 | 8.59 |
| 9 | 8.44 |
| 10 | 8.67 |
| 11 | 8.08 |
| 12 | 7.94 |
| 13 | 7.89 |
| 14 | 8.25 |

**Figures**


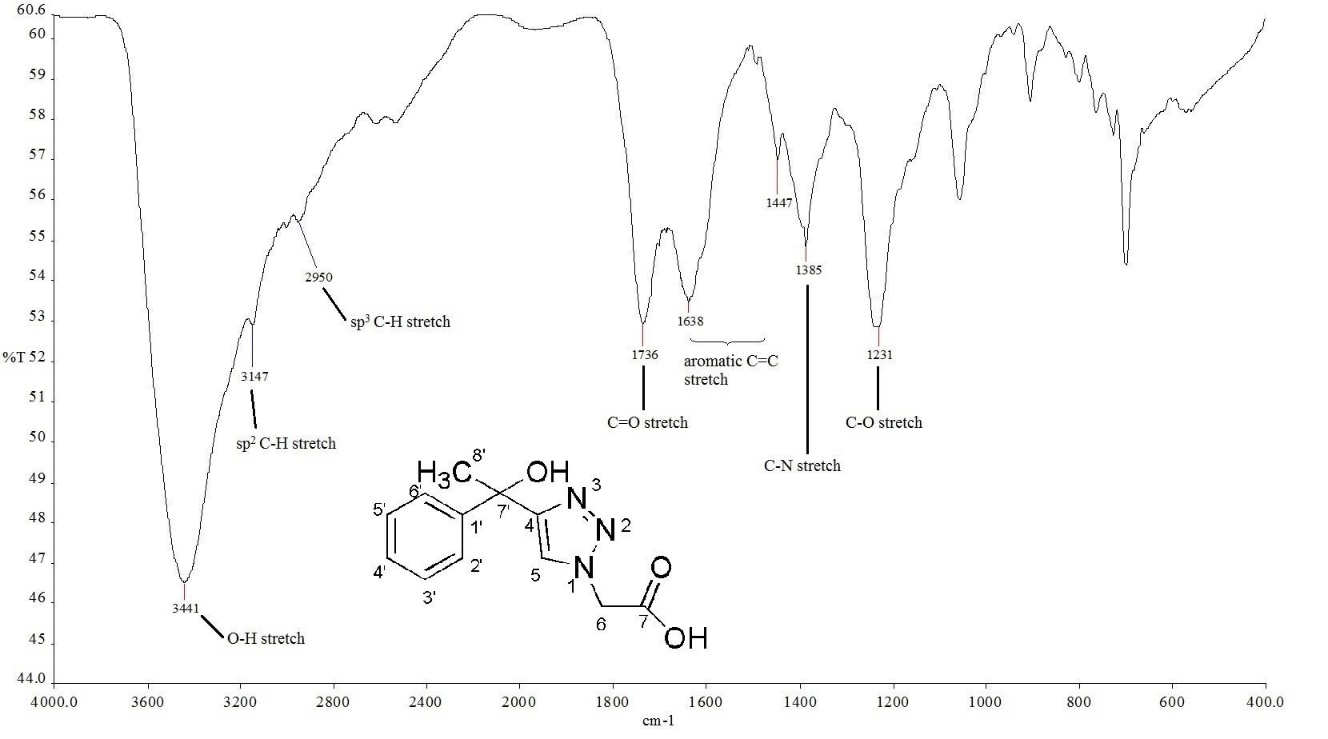


**Figure 1:** FT-IR spectrum of compound **3**


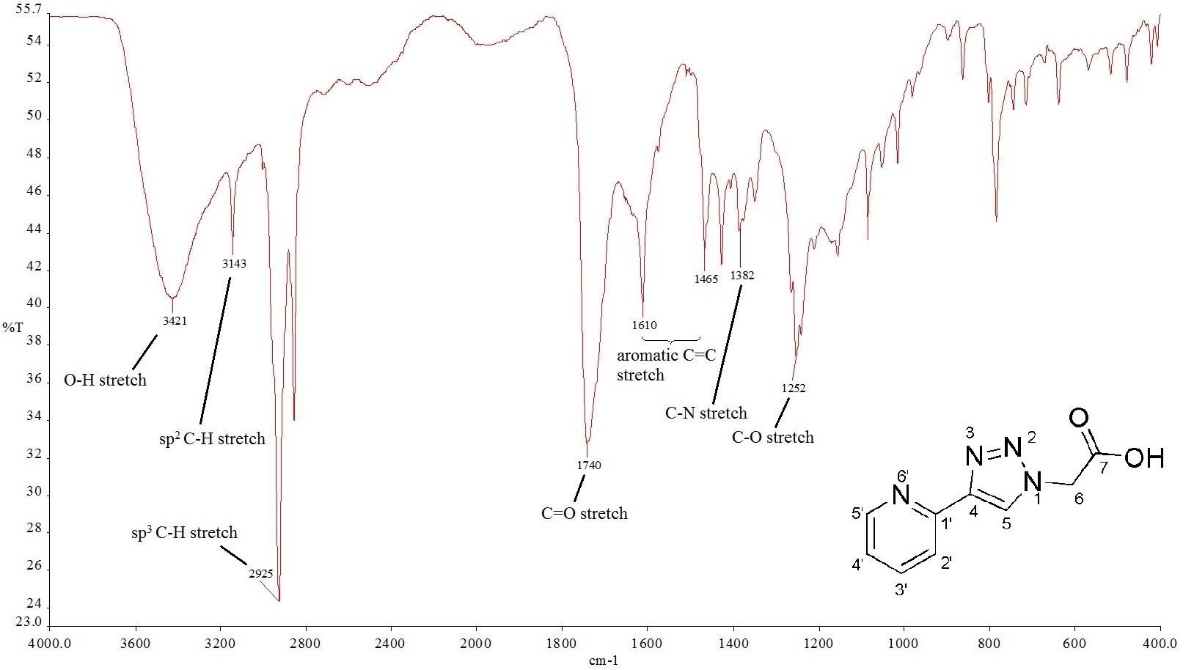


**Figure 2:** FT-IR spectrum of compound **8**


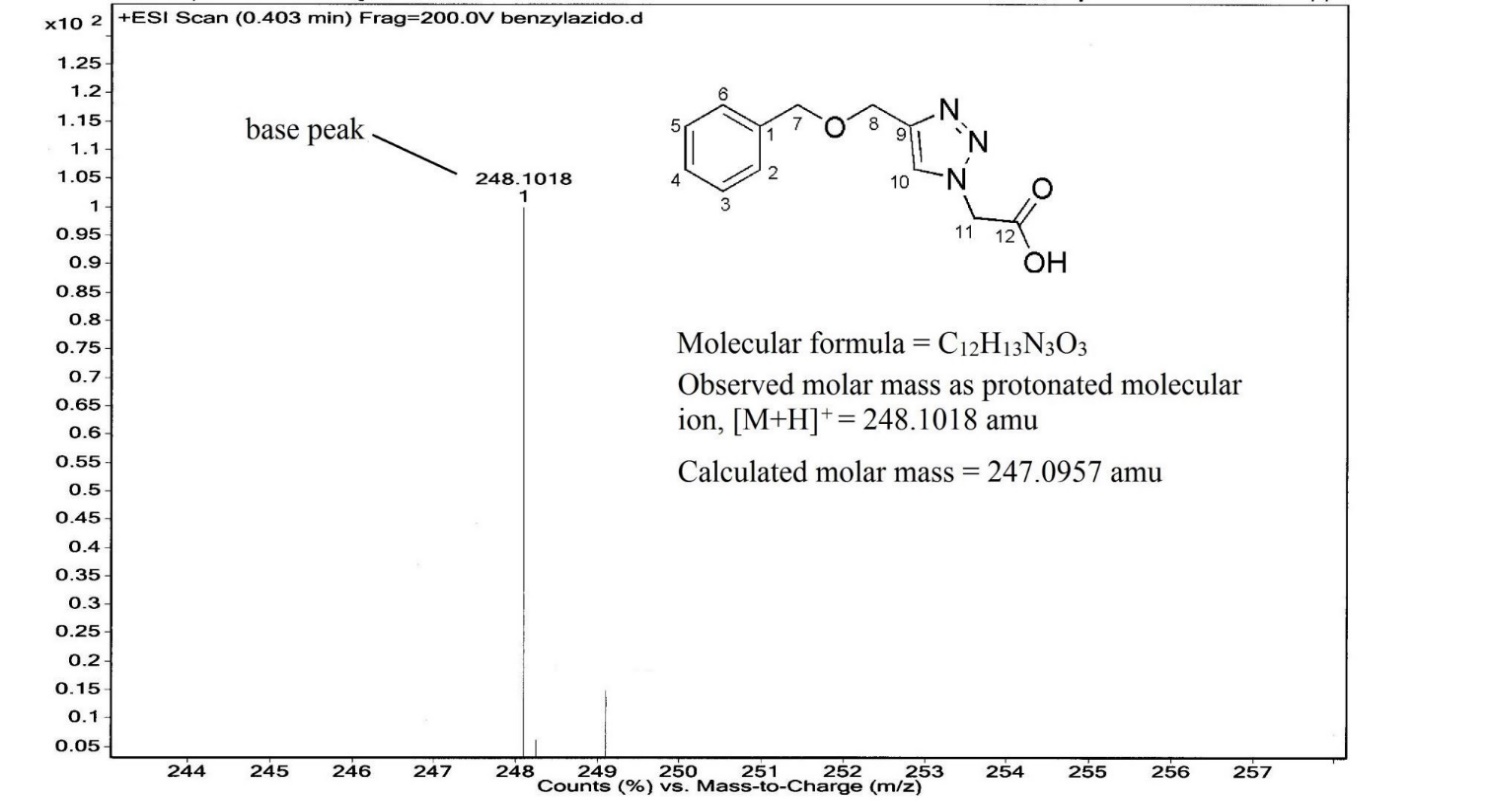


**Figure 3:** ESI-HRMS spectrum of compound **4**


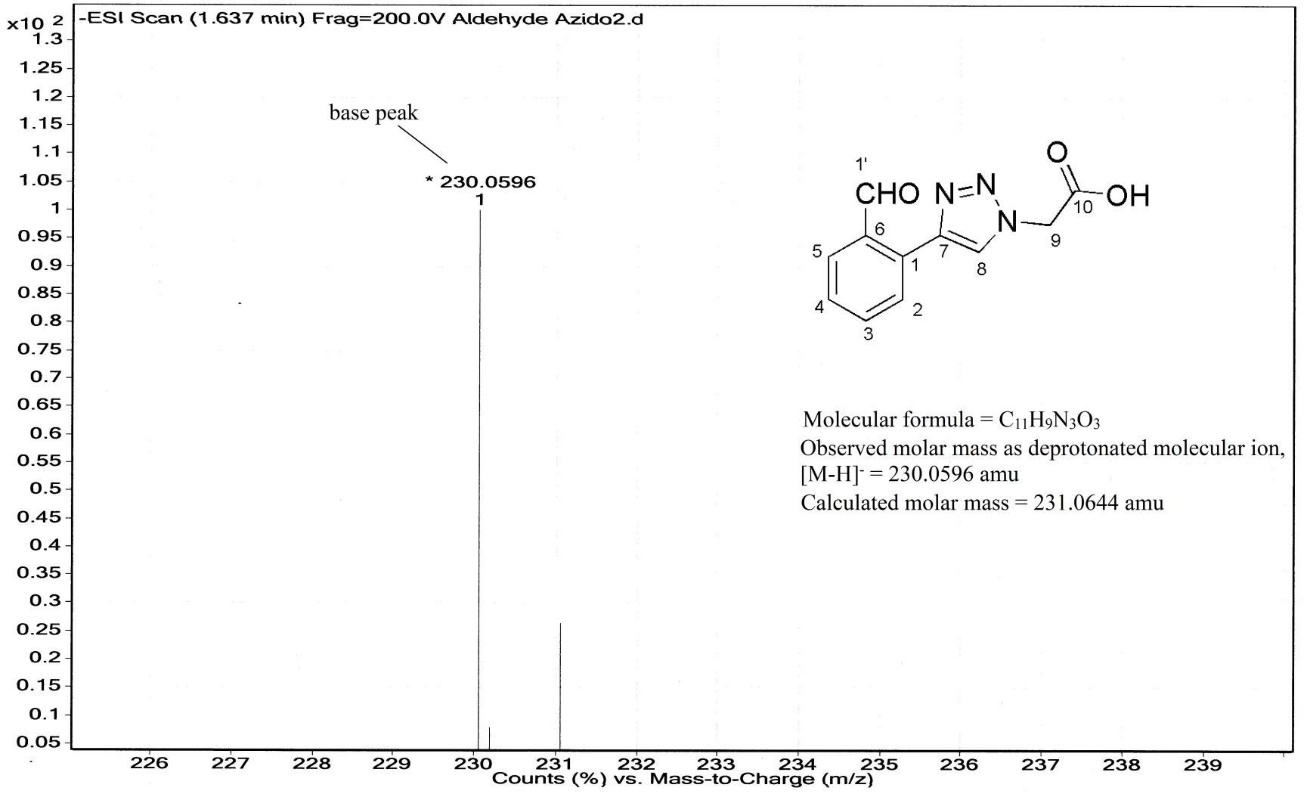


**Figure 4:** ESI-HRMS spectrum of compound **10**


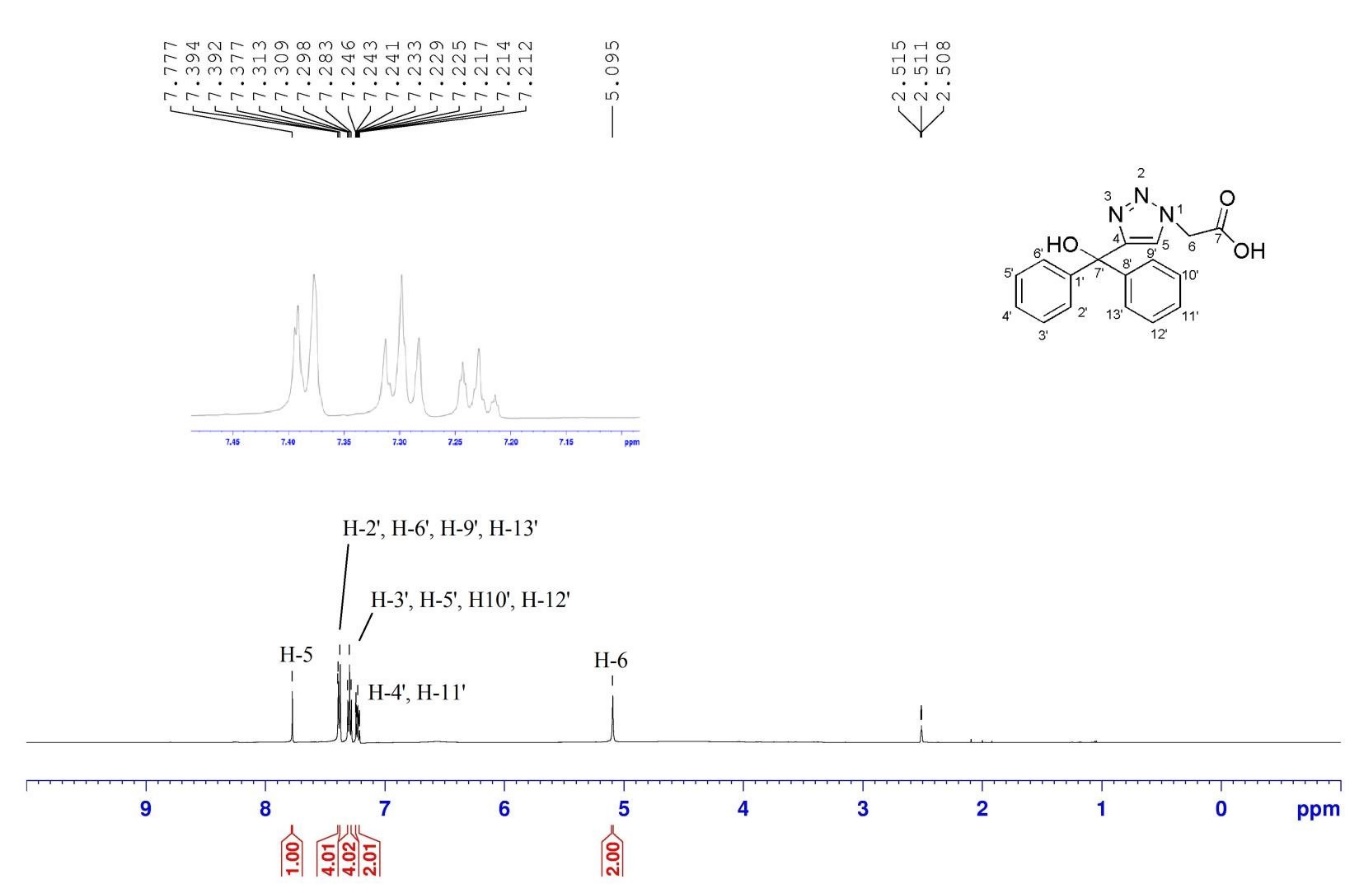


**Figure 5**: 1H NMR spectrum of compound **1** in DMSO-*d*6


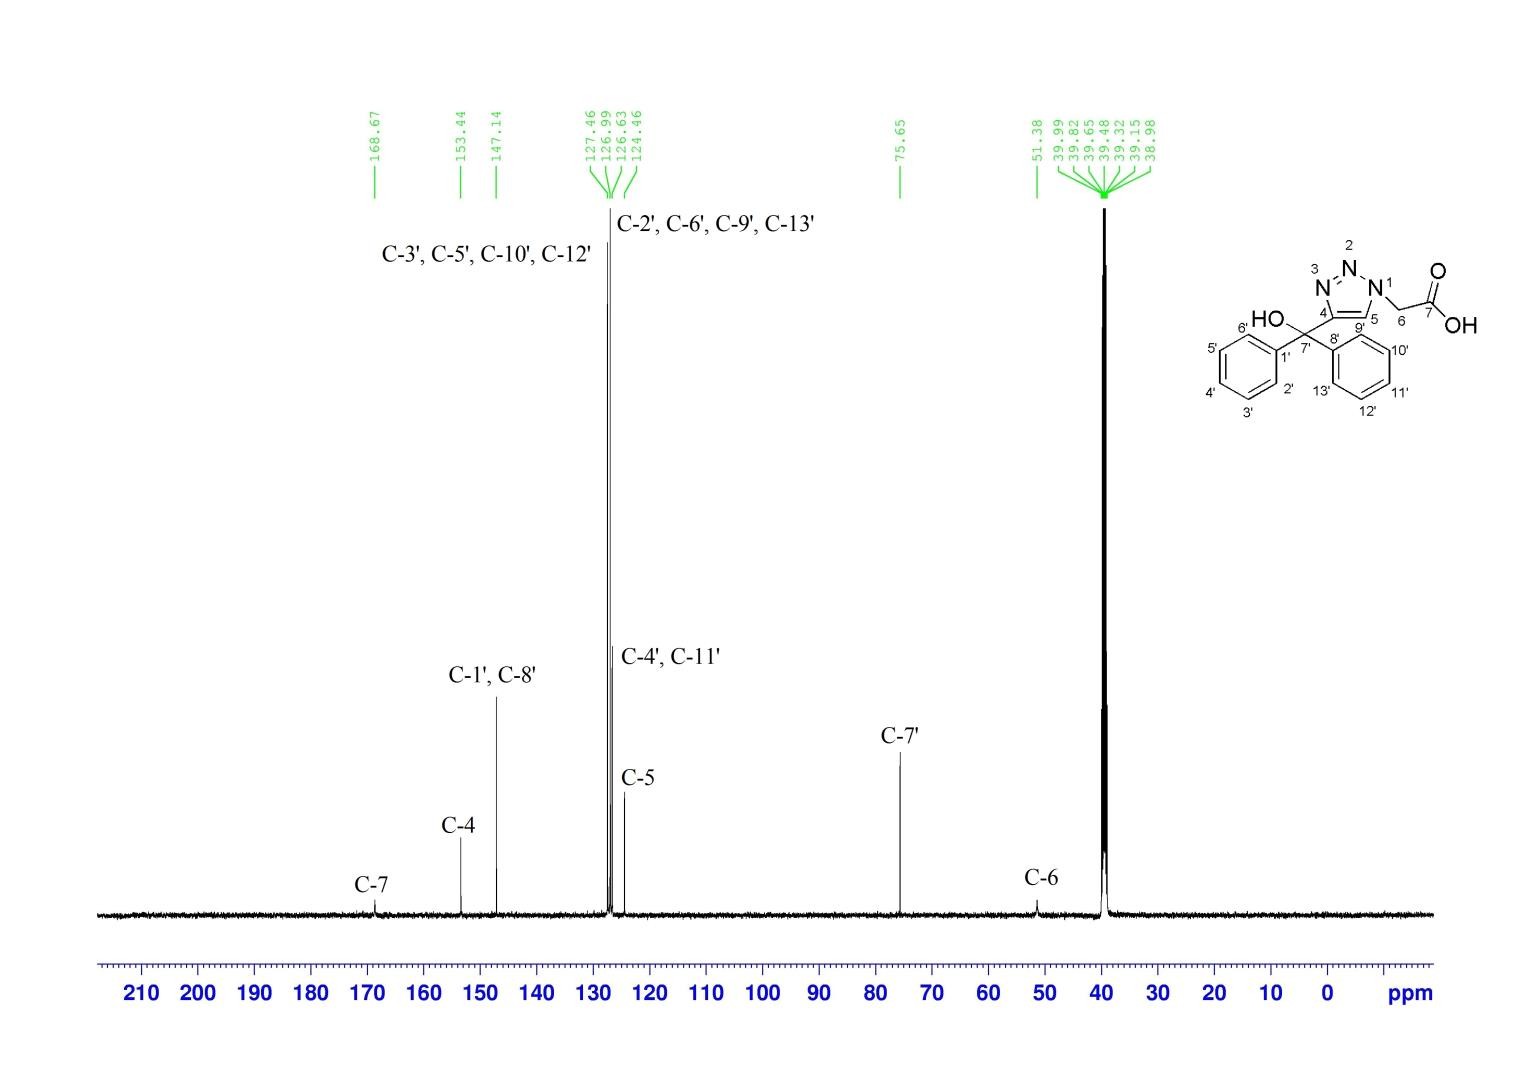


**Figure 6:** 13C NMR spectrum of compound **1** in DMSO-*d*6


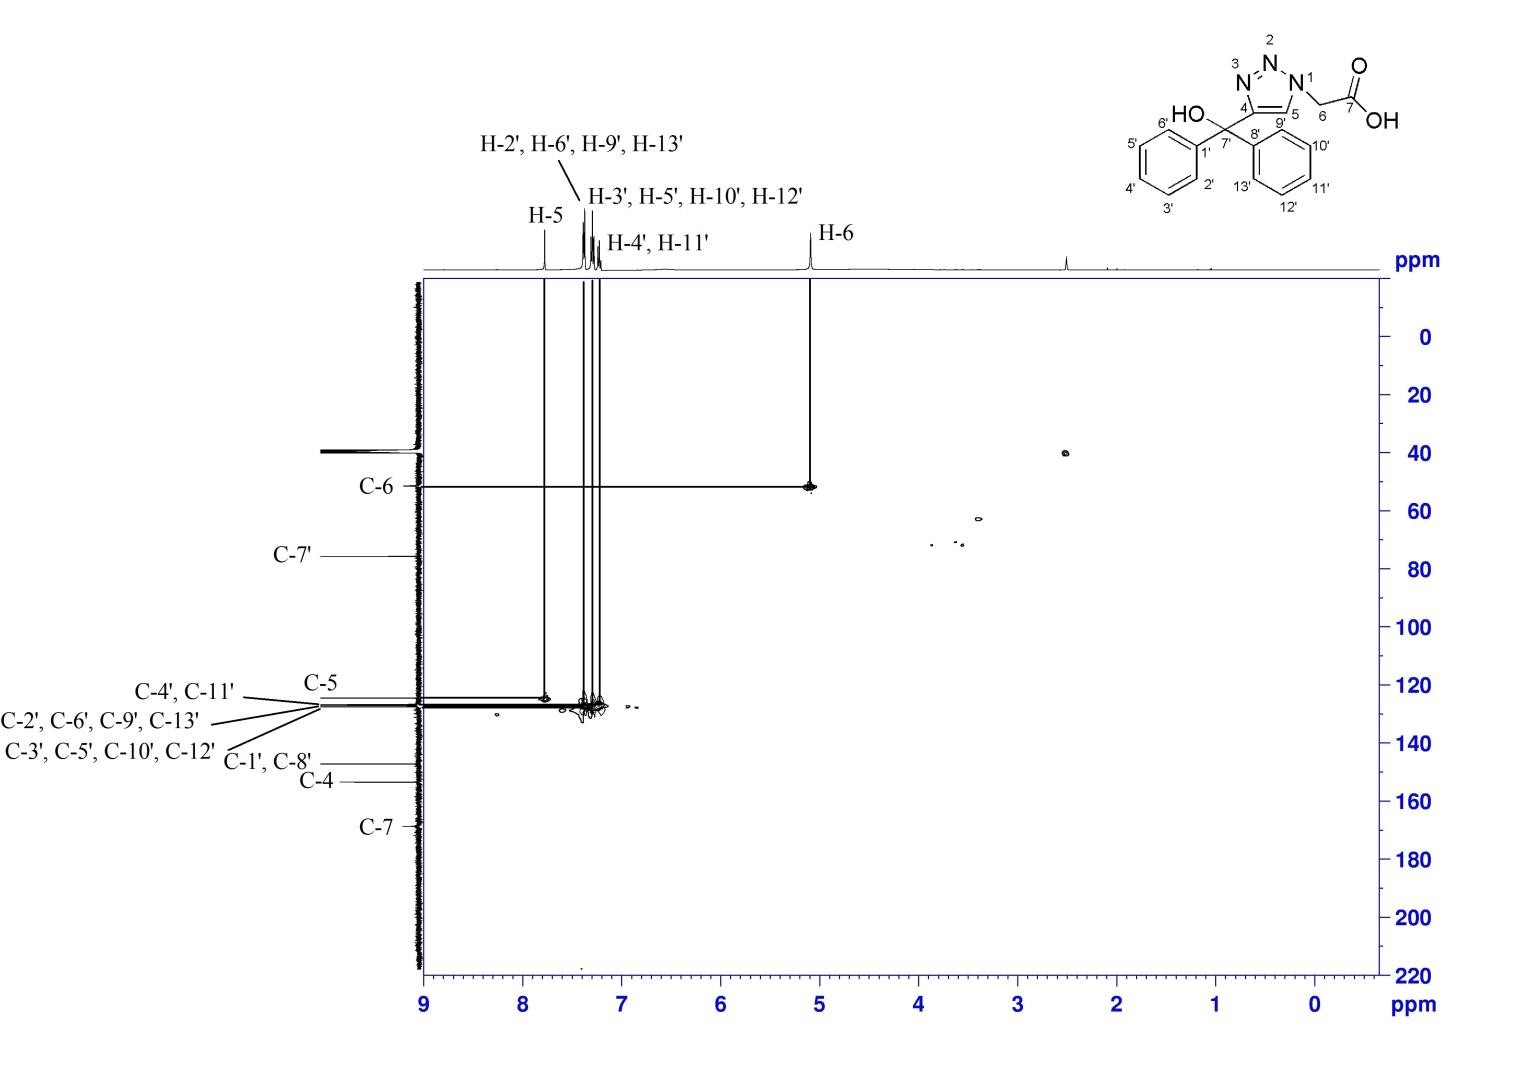


**Figure 7**: 1H-13C HSQC spectrum of compound **1** in DMSO-*d*6


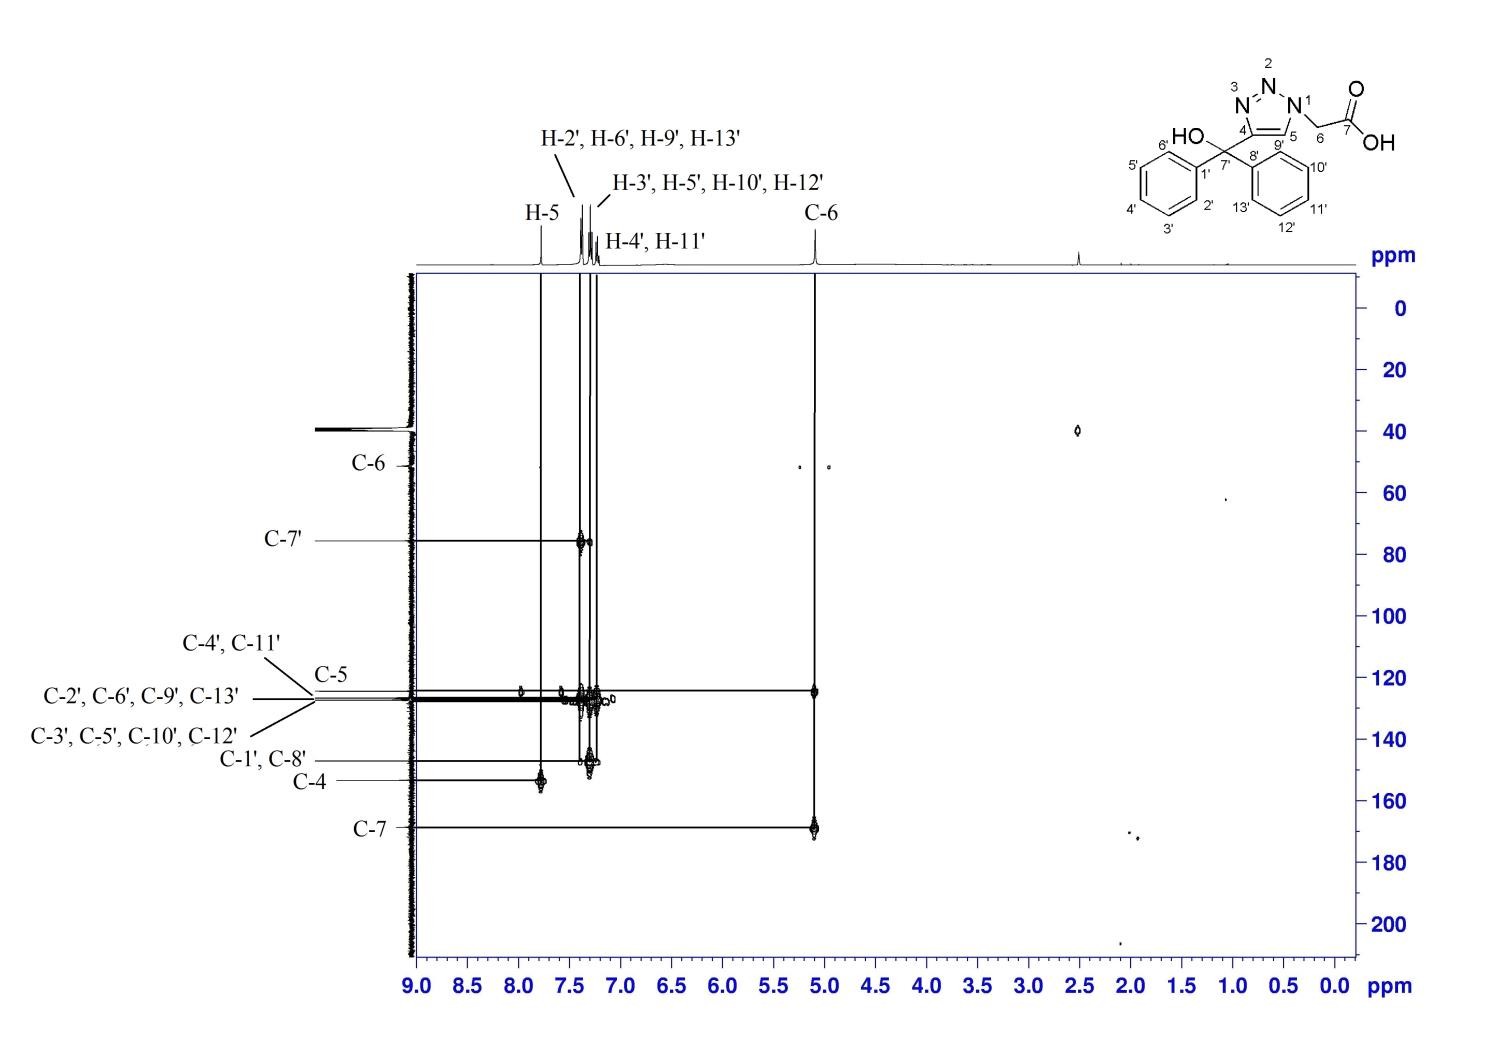


**Figure 8**: 1H -13C HMBC spectrum of compound **1** in DMSO-*d*6


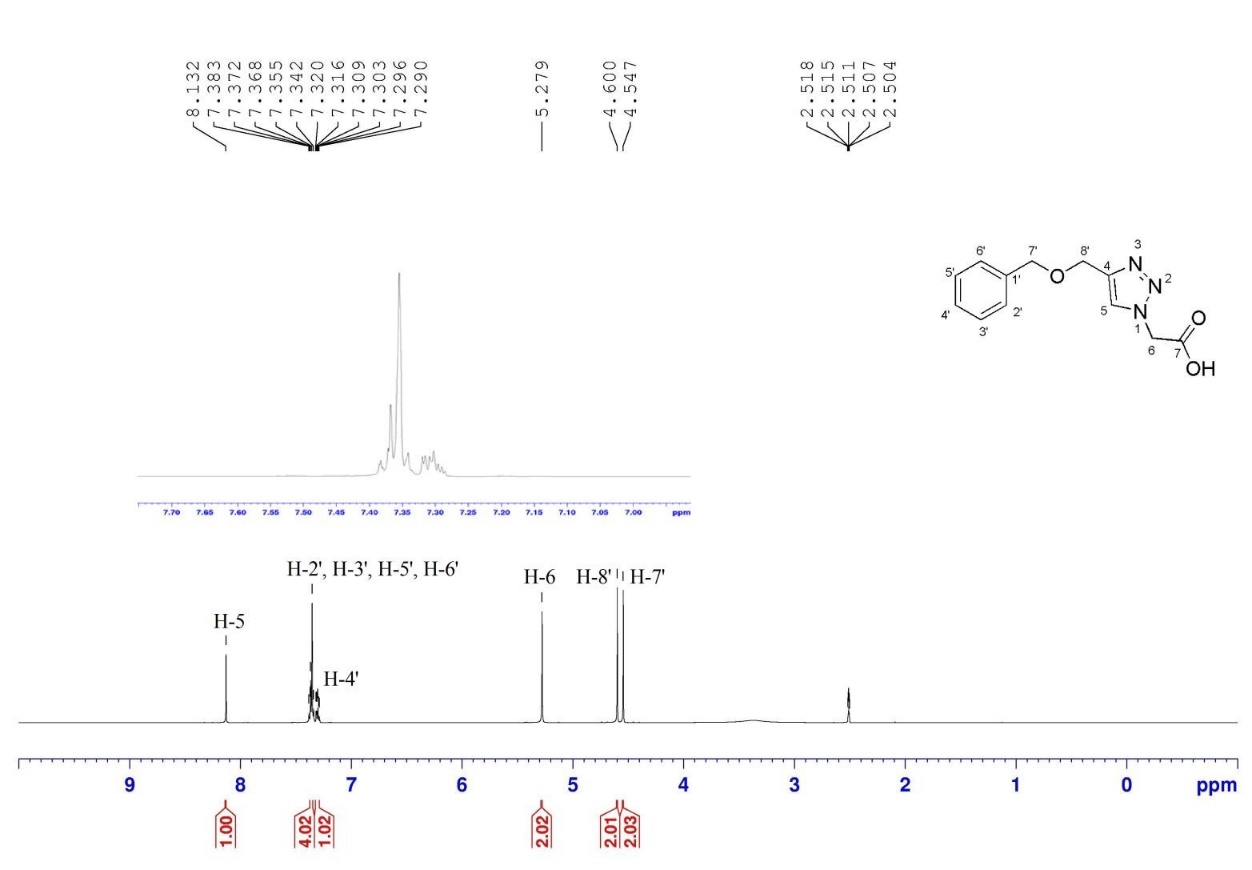


**Figure 9:** 1H NMR spectrum of compound **4** in DMSO-*d*6


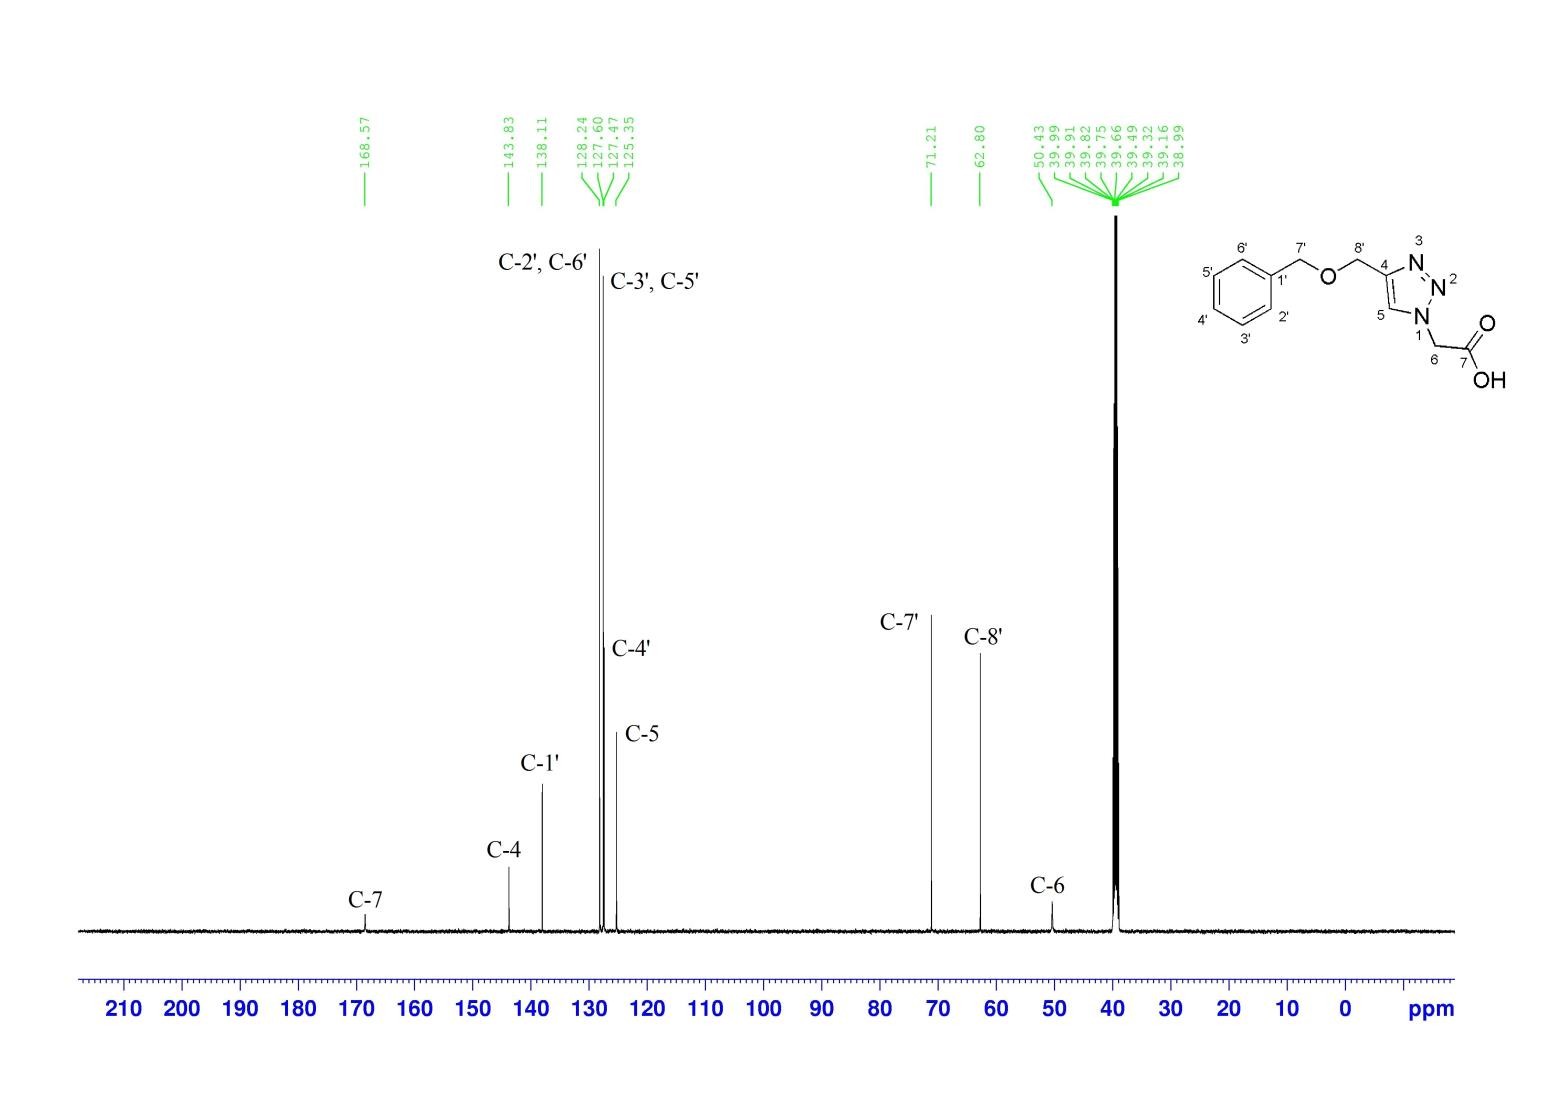


**Figure 10**: 13C NMR spectrum of compound **4** in DMSO-*d*6


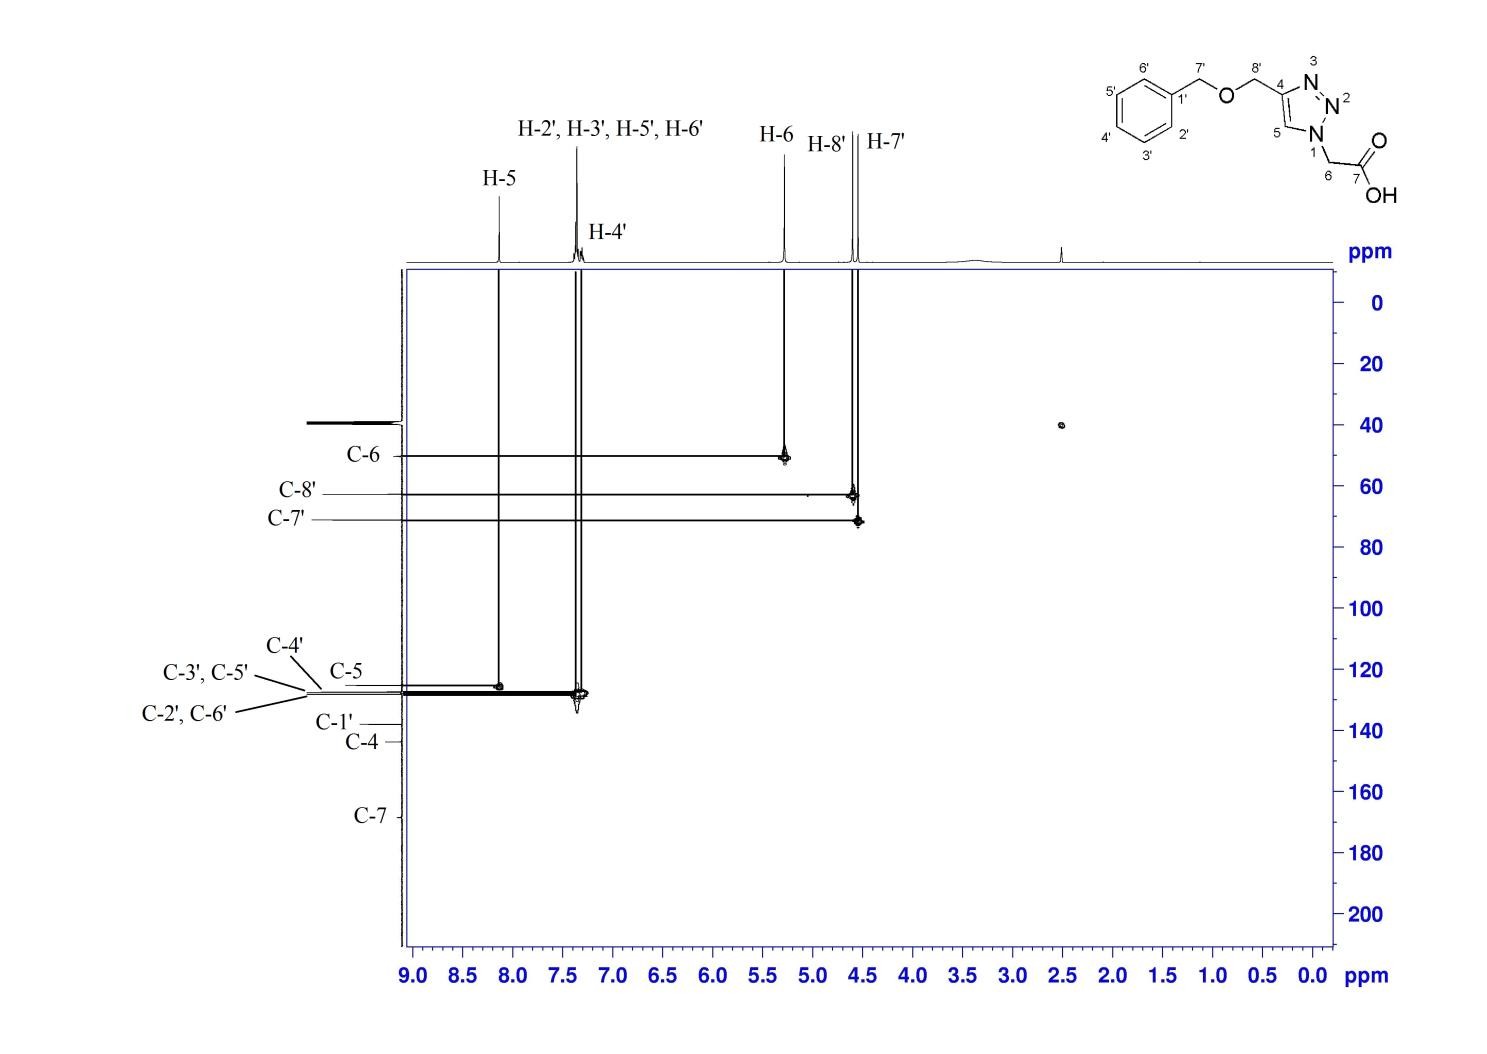


**Figure 11**: 1H -13C HSQC spectrum of compound **4** in DMSO-*d*6


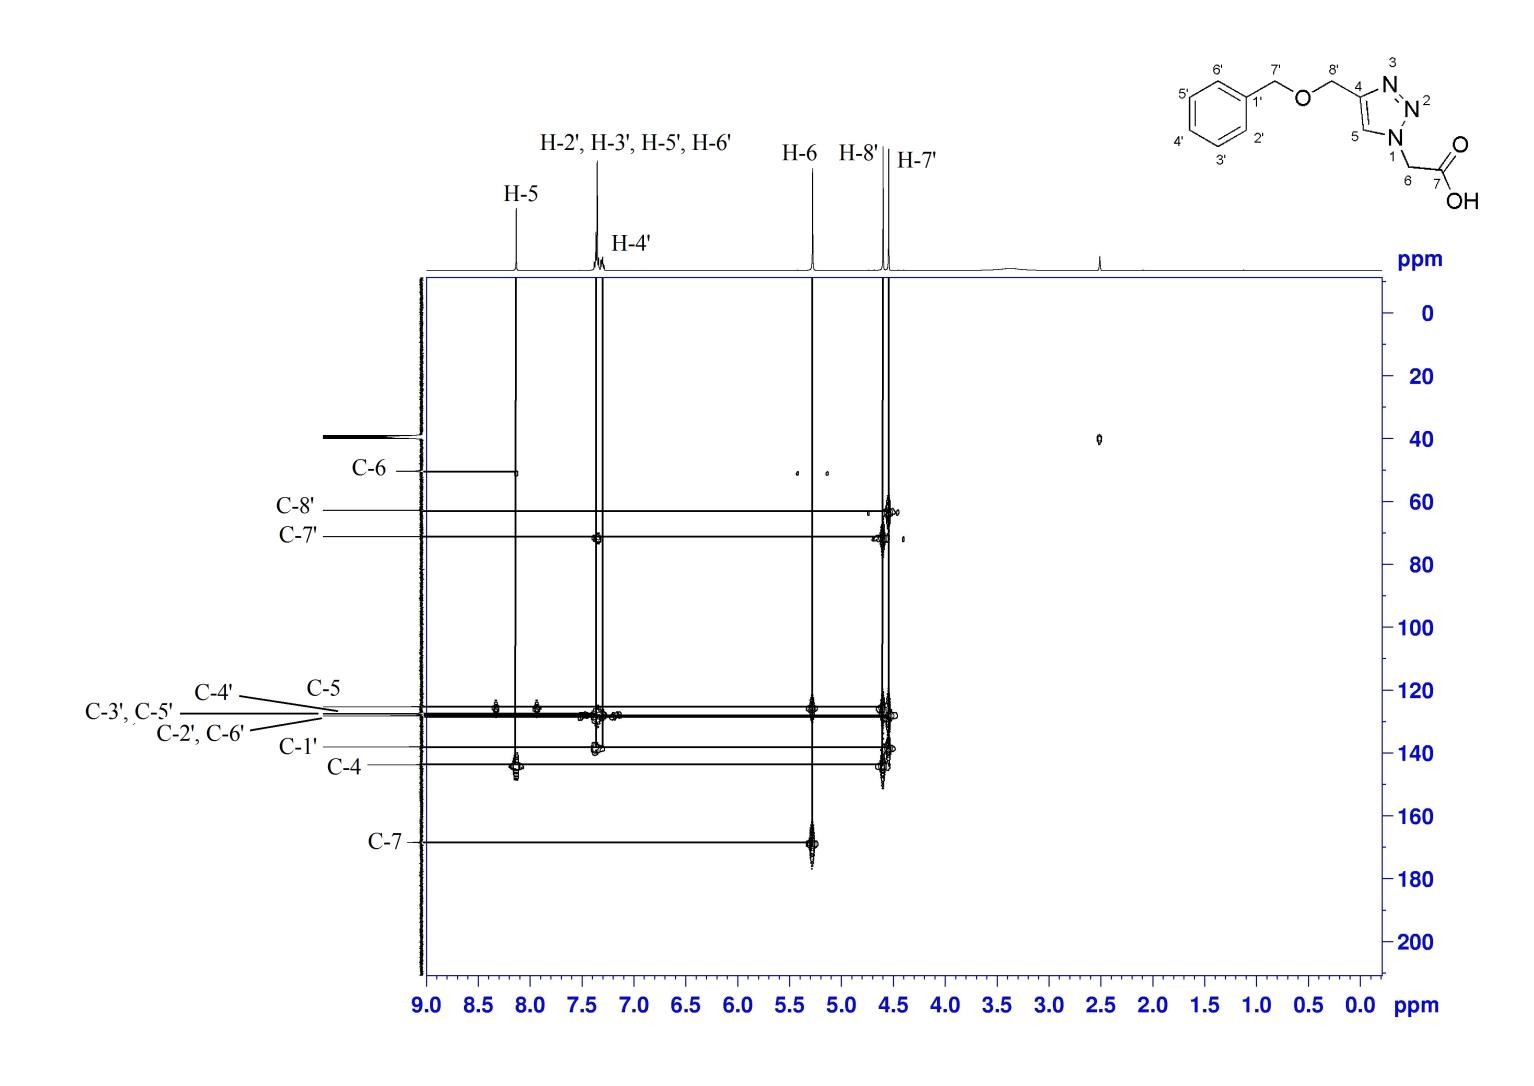


**Figure 12:** 1H -13C HMBC spectrum of compound **4** in DMSO-*d*6


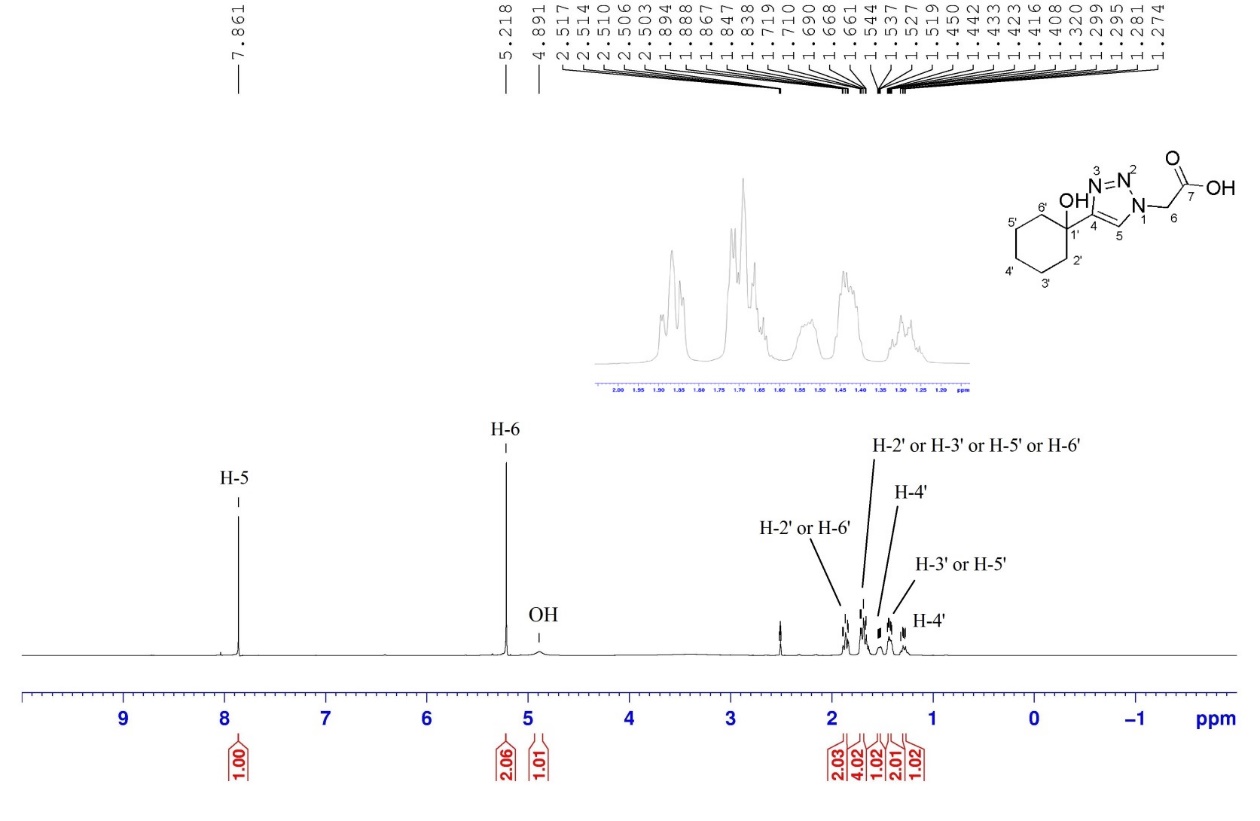


**Figure 13:** 1H NMR spectrum of compound **6** in DMSO-*d*6


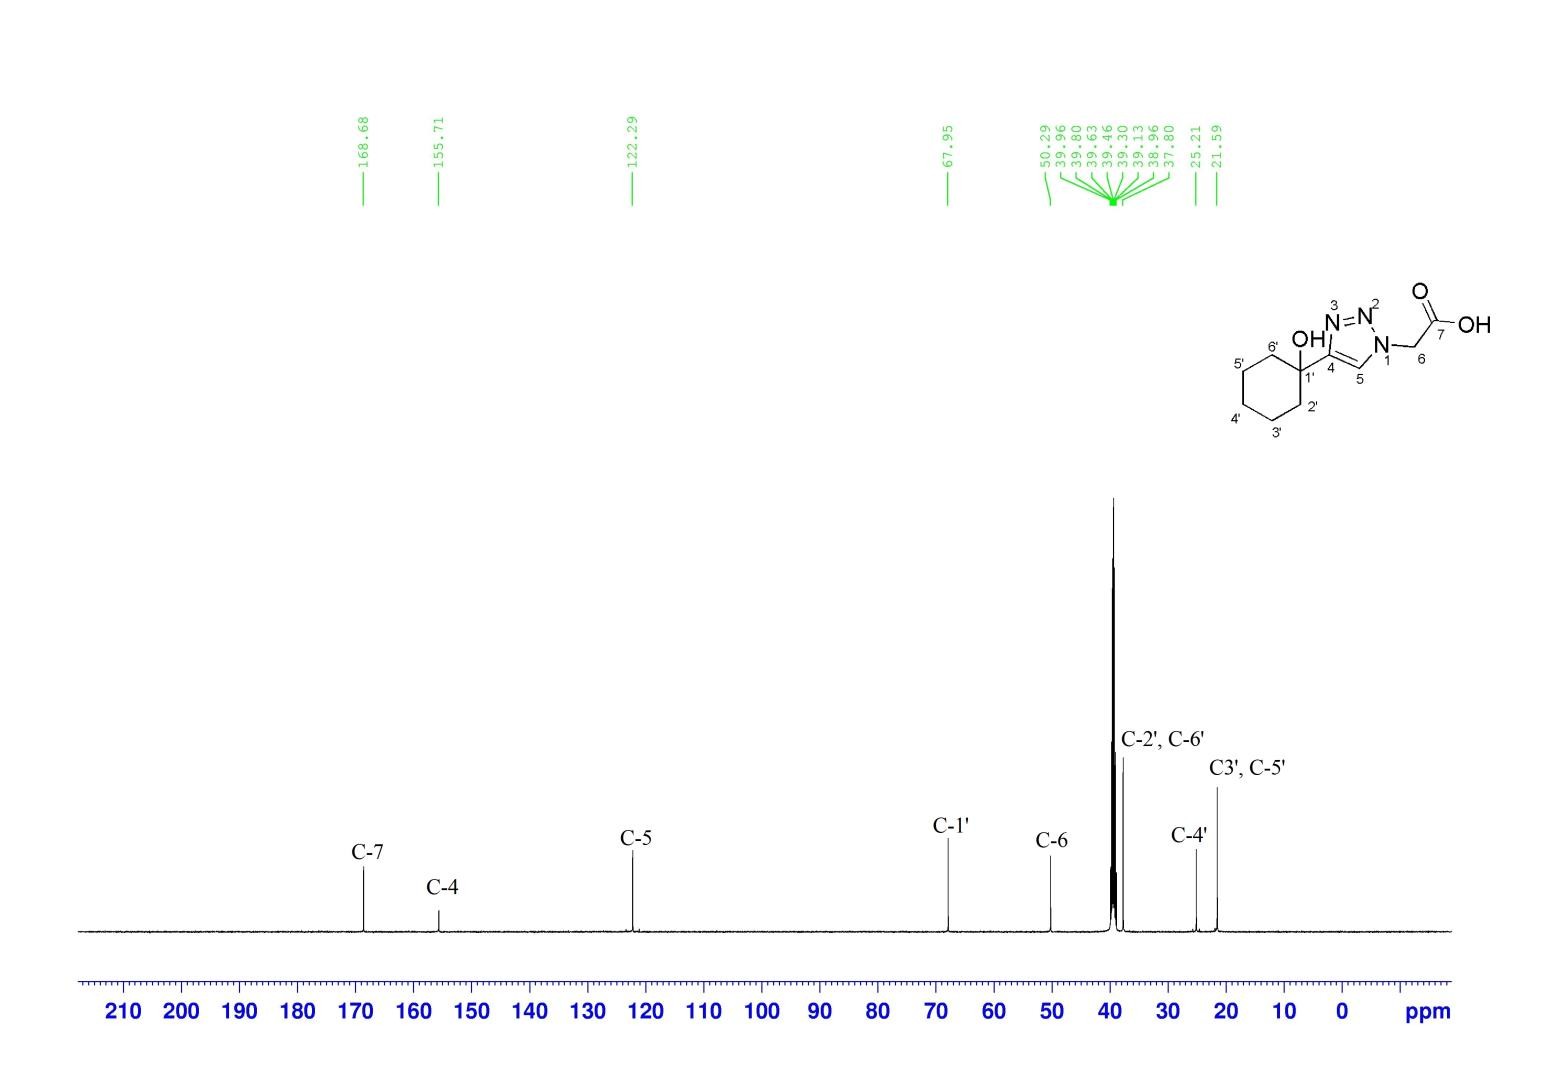


**Figure 14:** 13C NMR spectrum of compound **6** in DMSO-*d*6


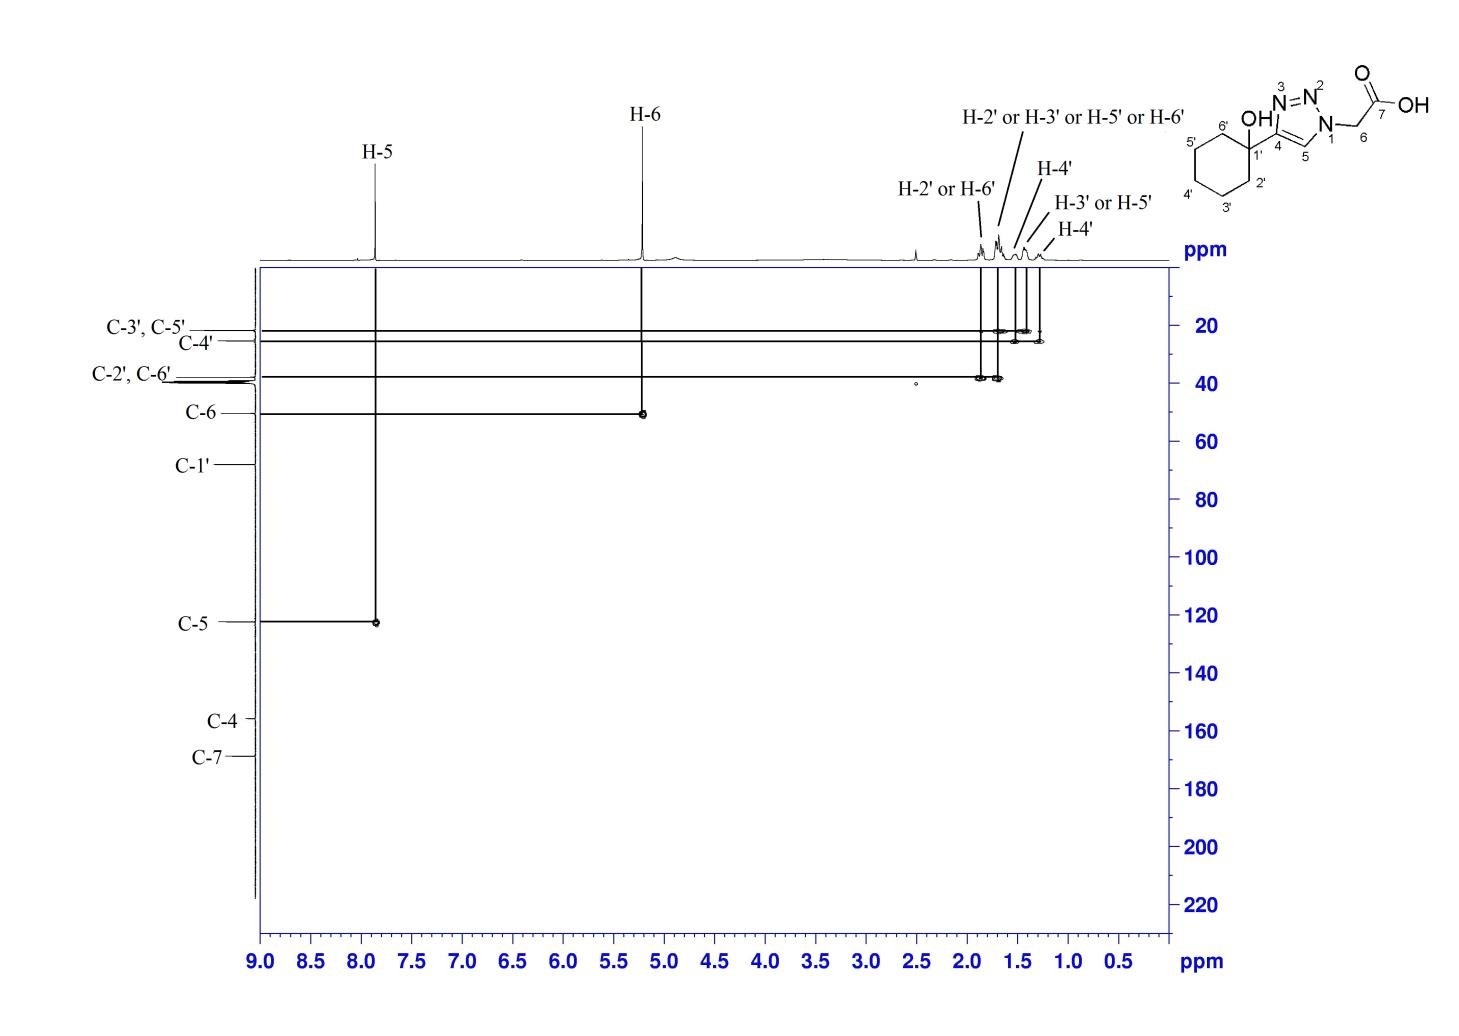
**Figure 15:** 1H -13C HSQC spectrum of compound **6** in DMSO-*d*6


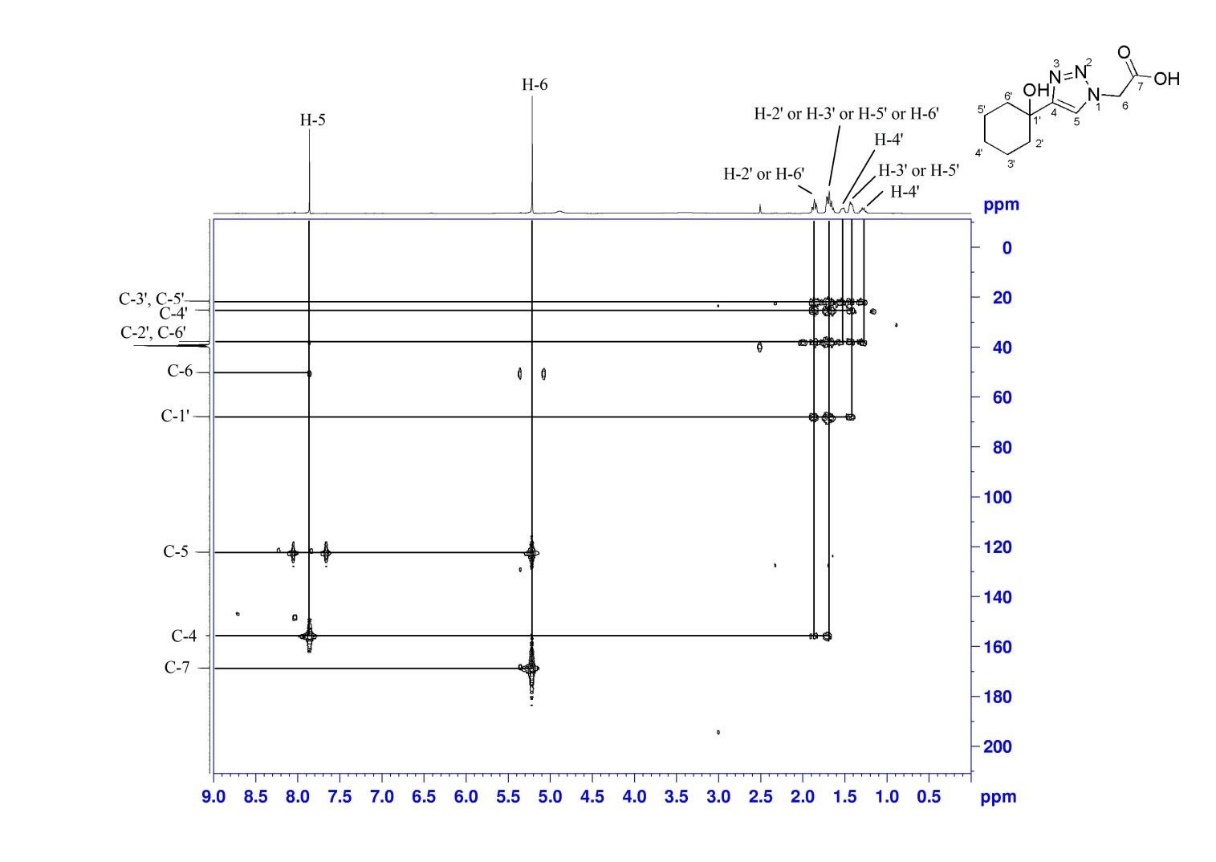


**Figure 16:** 1H -13C HMBC spectrum of compound **6** in DMSO-*d*6


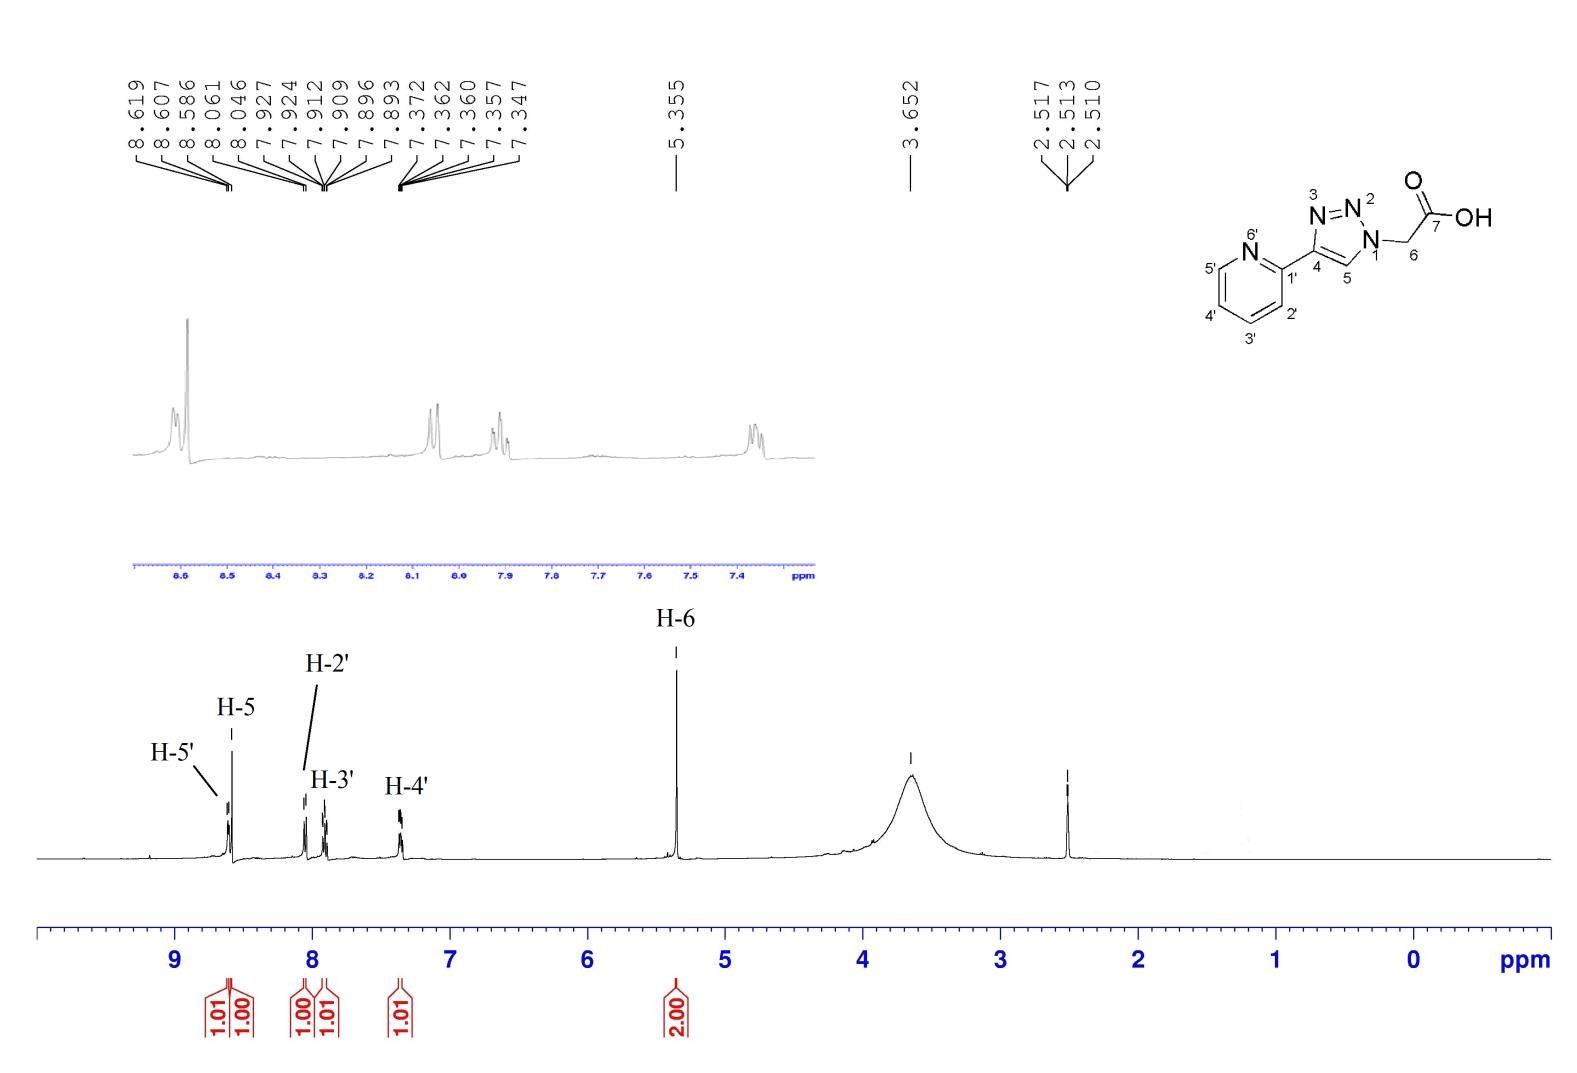


**Figure 17:** 1H NMR spectrum of compound **8** in DMSO-*d*6


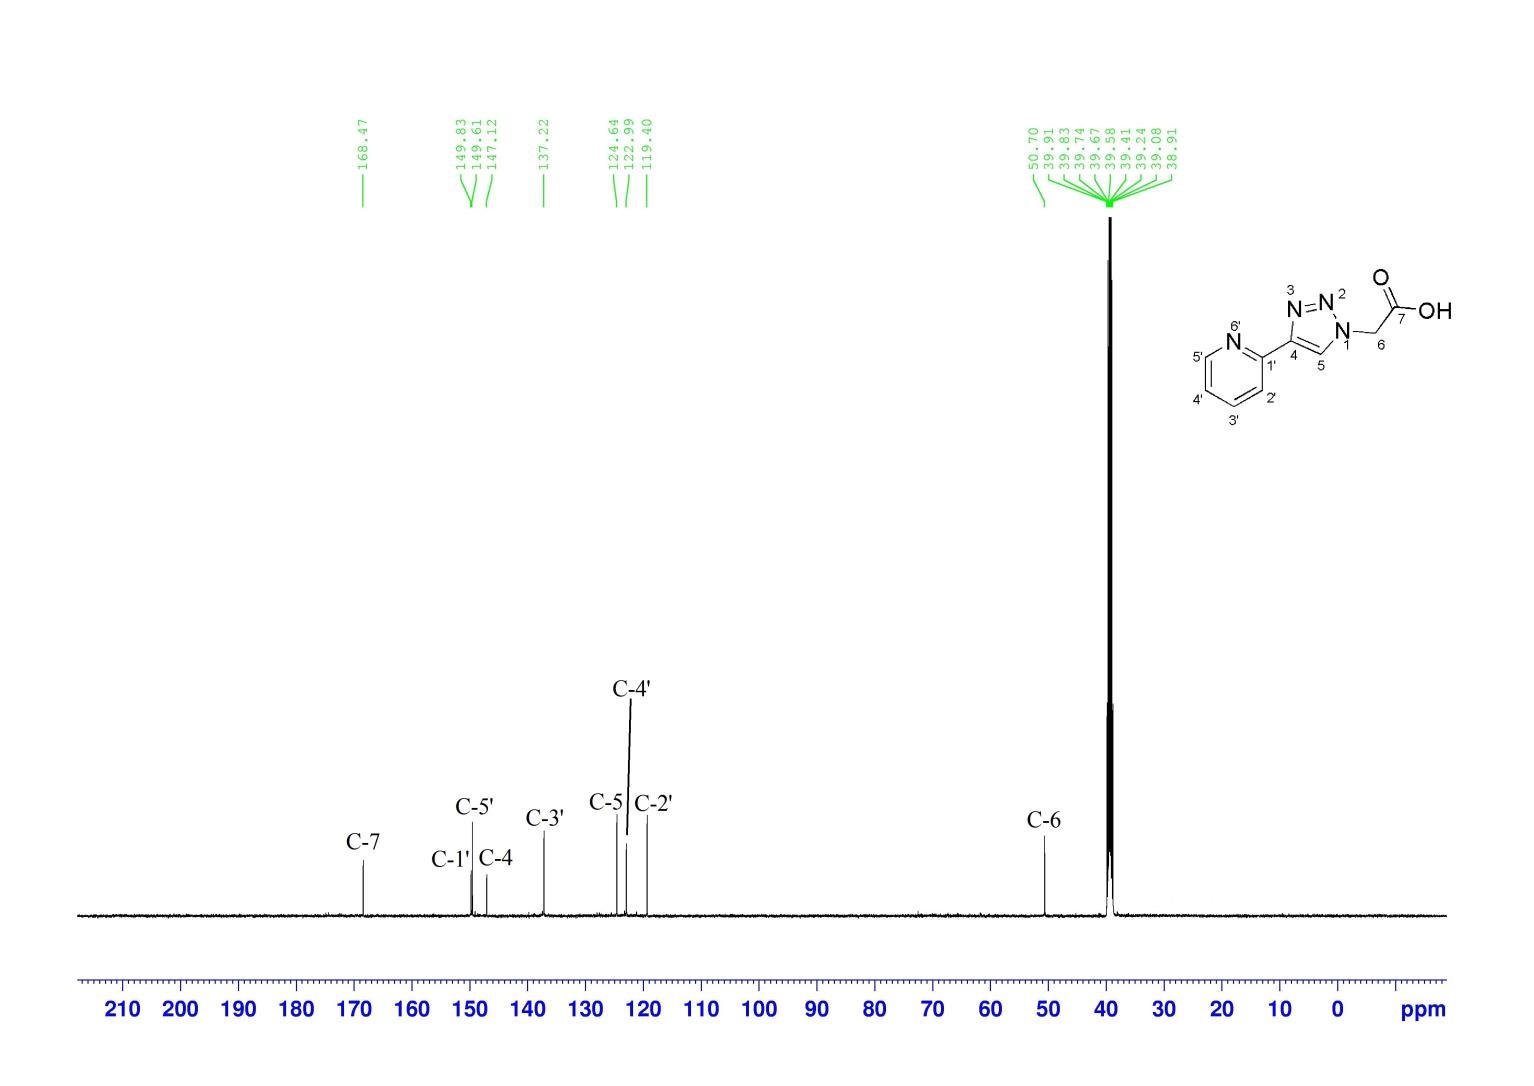


**Figure 18:** 13C NMR spectrum of compound **8** in DMSO-*d*6


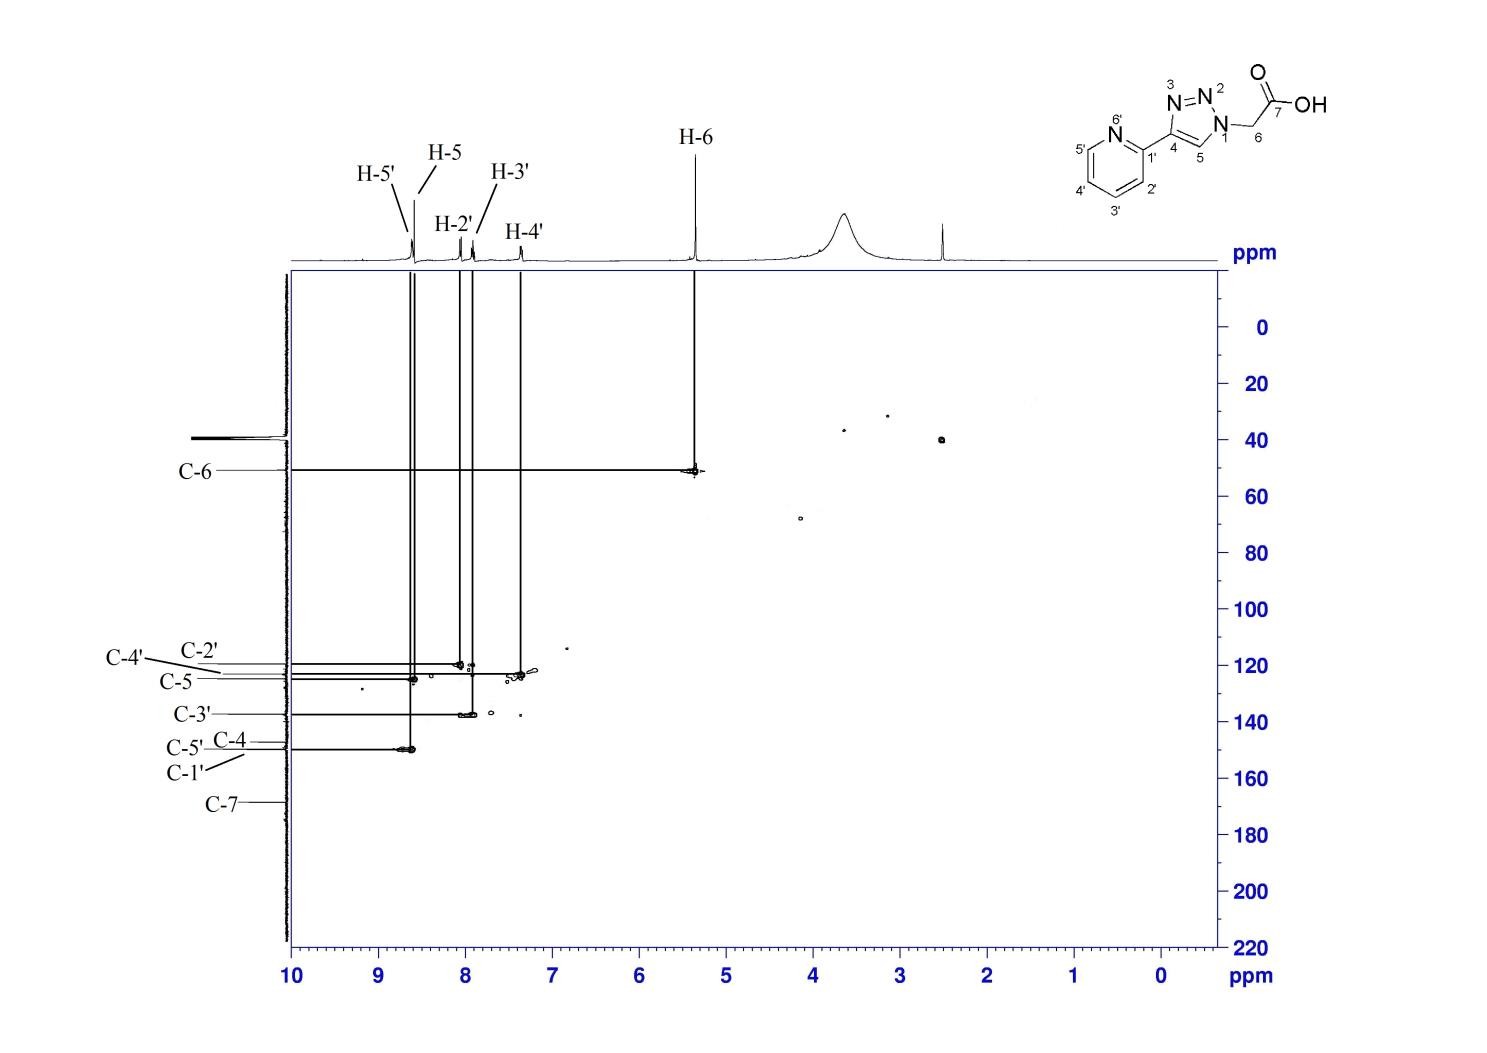


**Figure 19:** 1H -13C HSQC spectrum of compound **8** in DMSO-*d*6


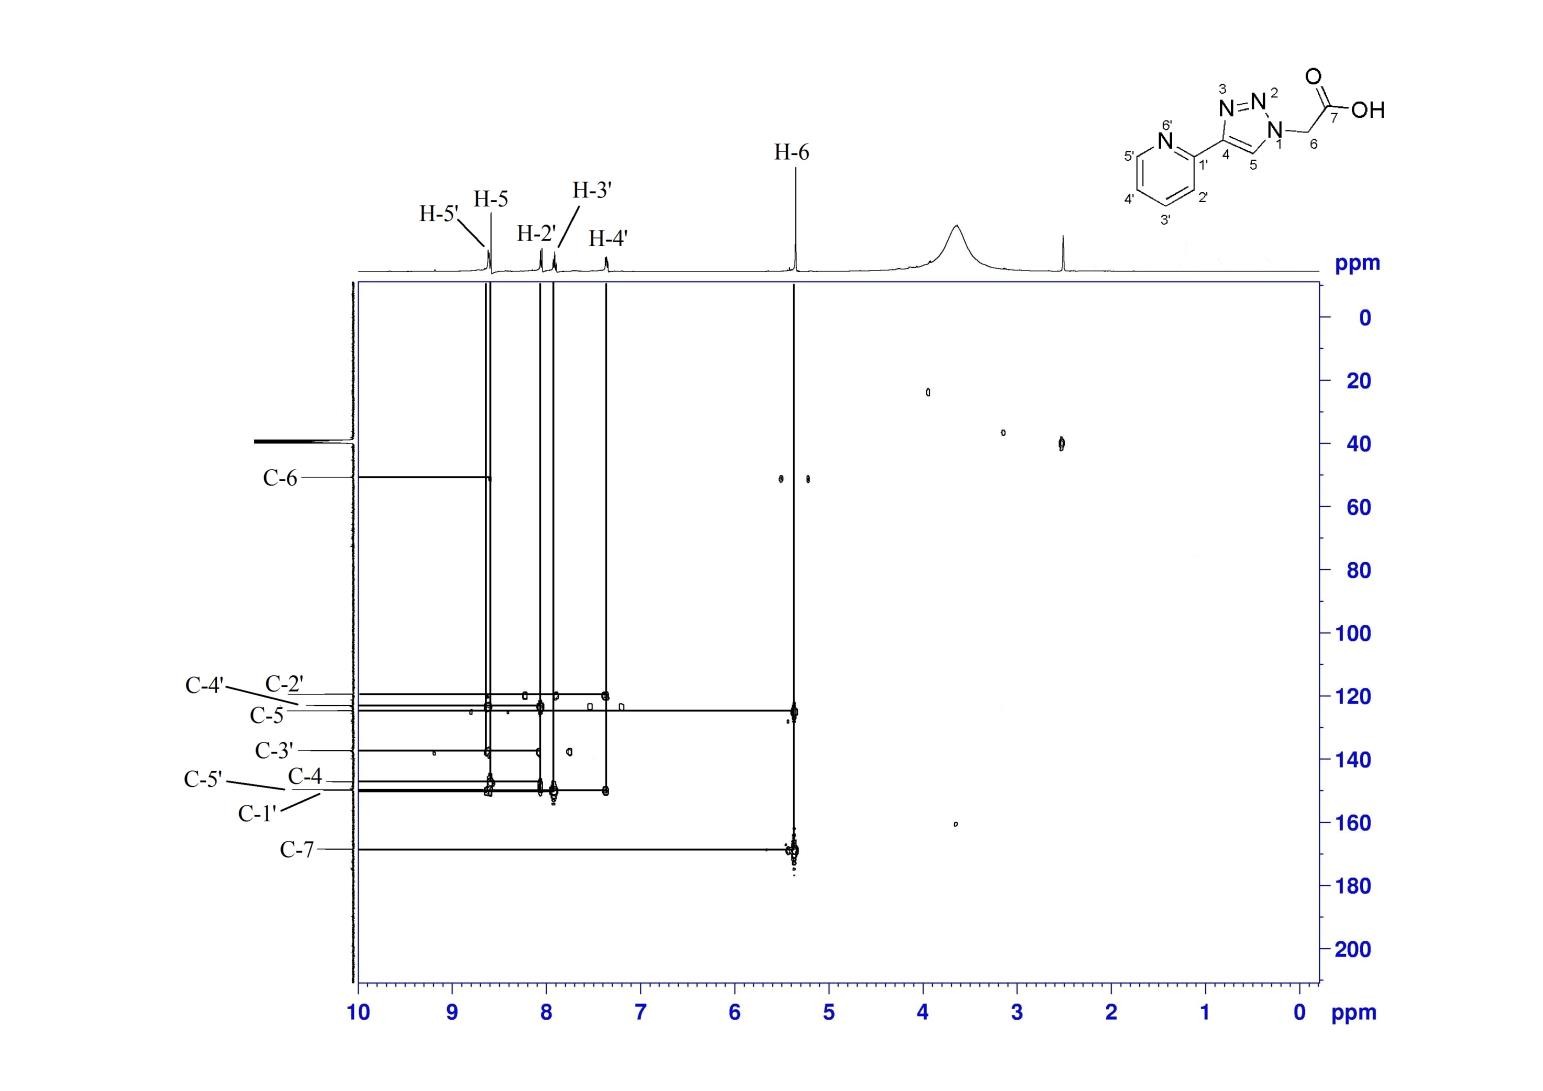


**Figure 20:** 1H -13C HMBC spectrum of compound **8** in DMSO-*d*6


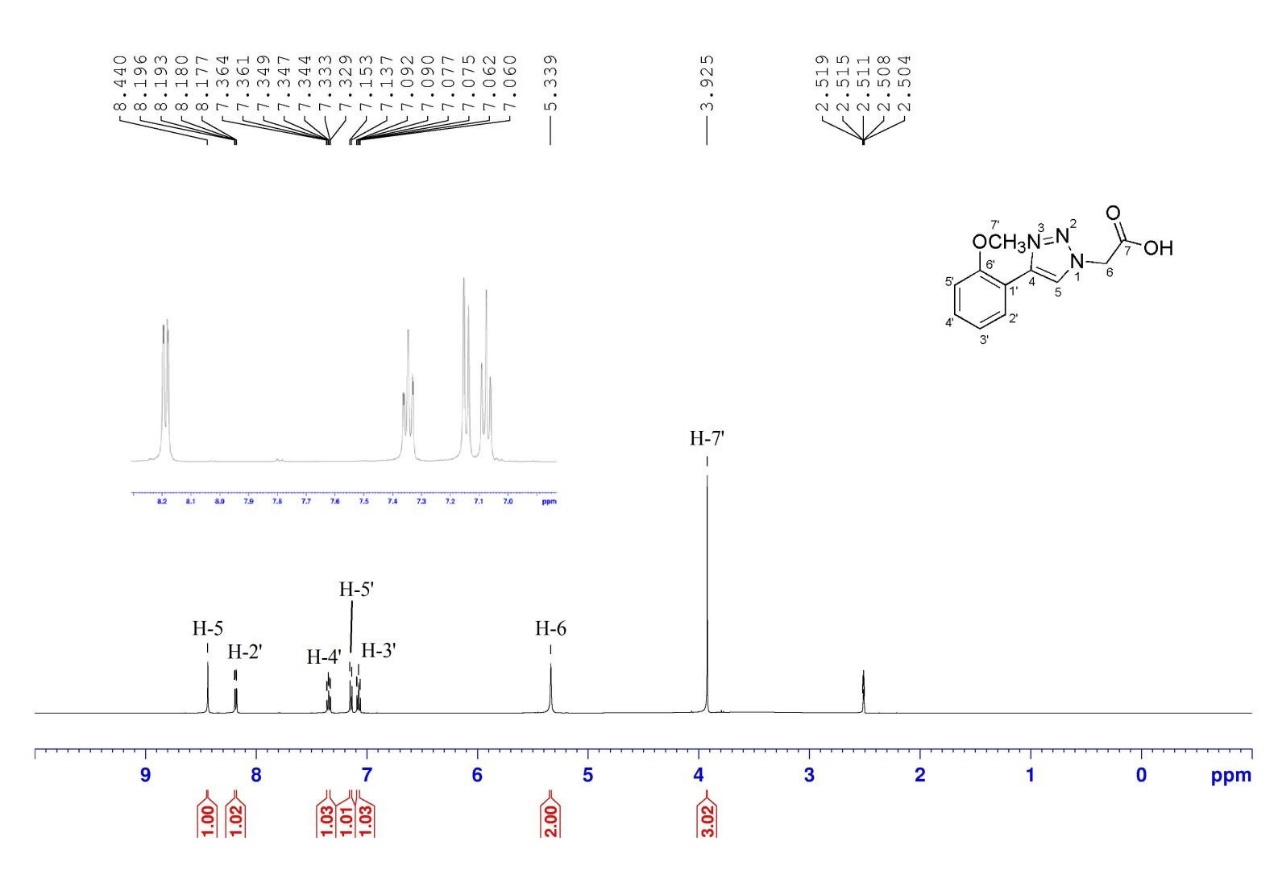


**Figure 21:** 1H NMR spectrum of compound **9** in DMSO-*d*6


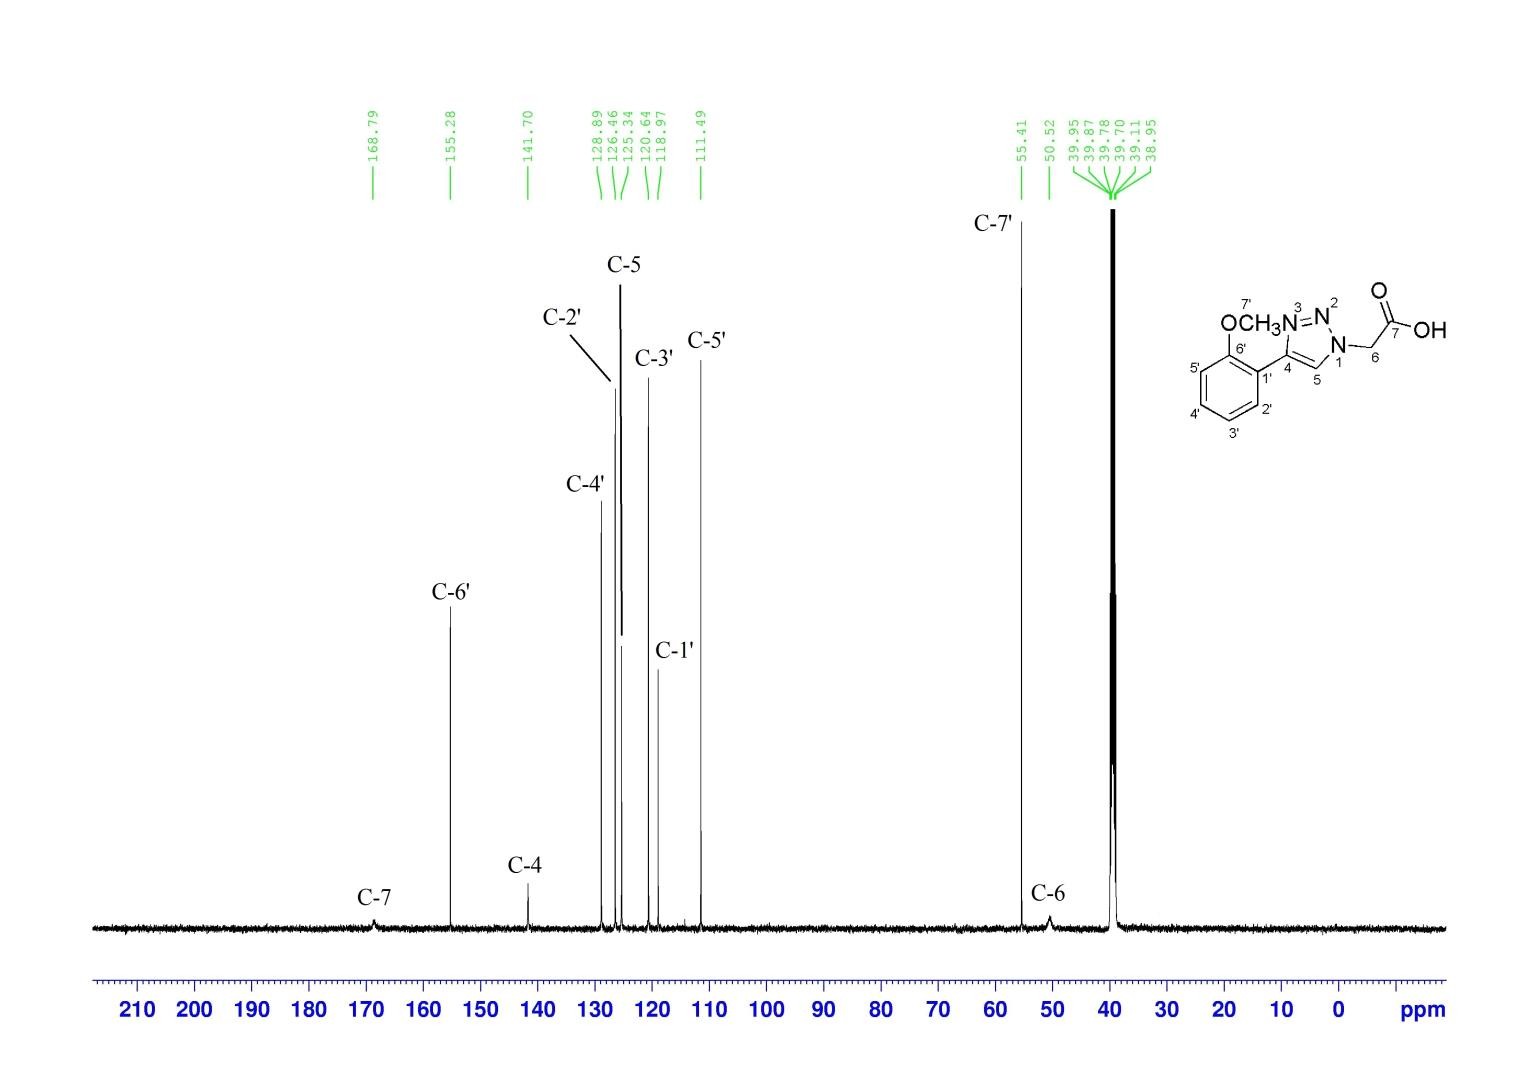


**Figure 22:** 13C NMR spectrum of compound **9** in DMSO-*d*6


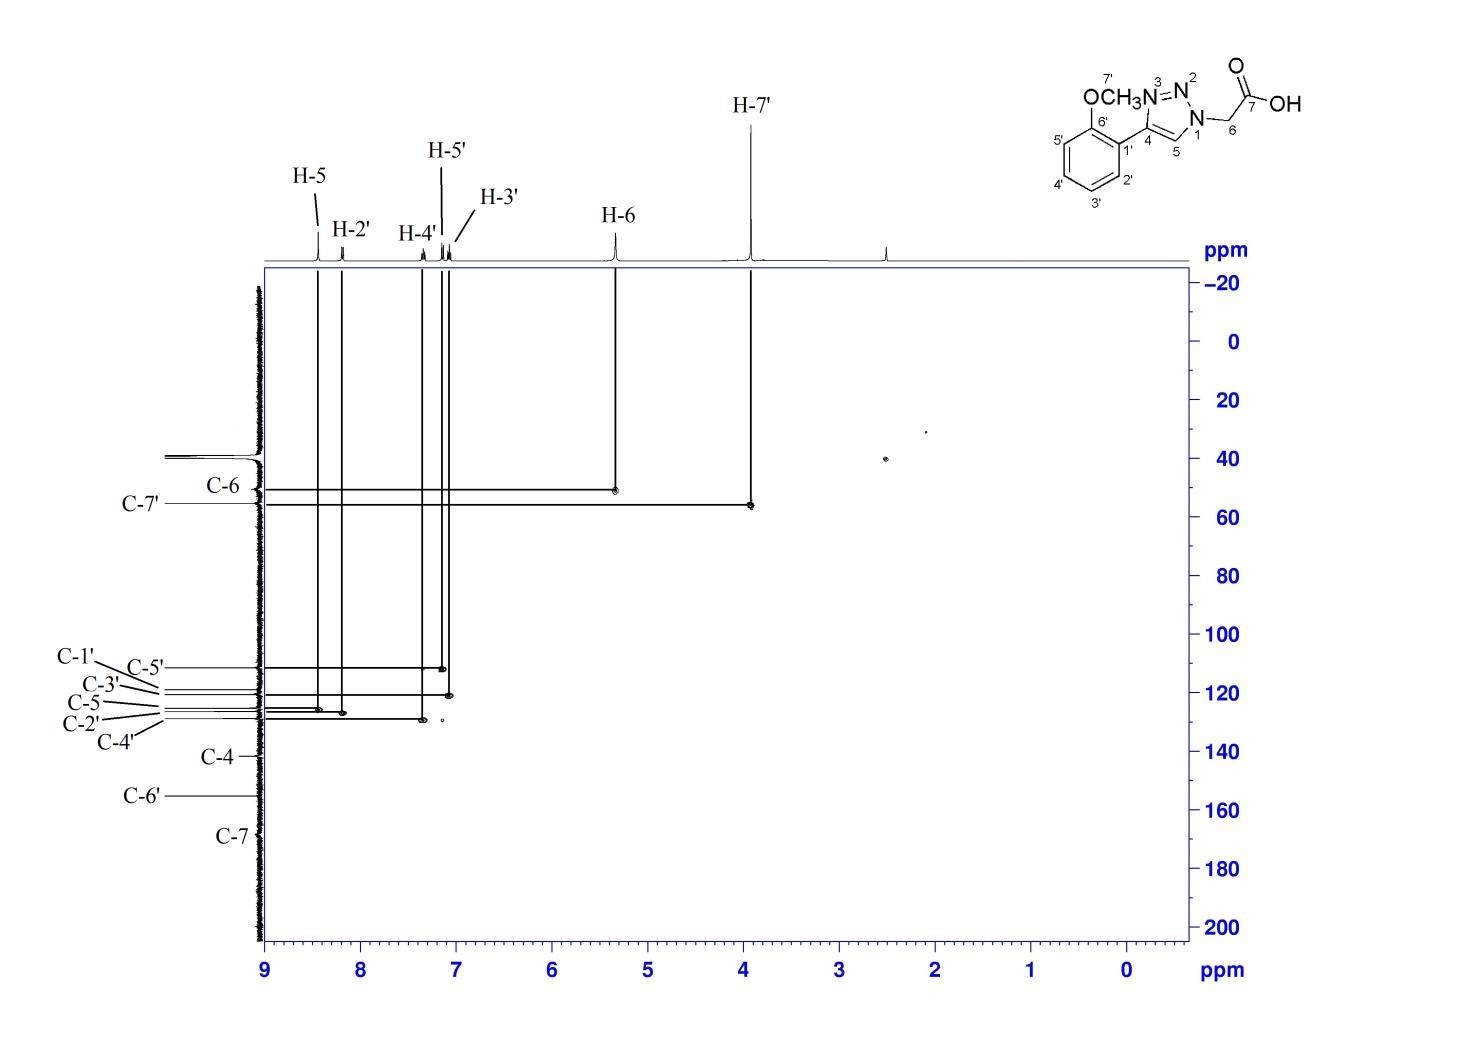


**Figure 23:** 1H -13C HSQC spectrum of compound **9** in DMSO-*d*6


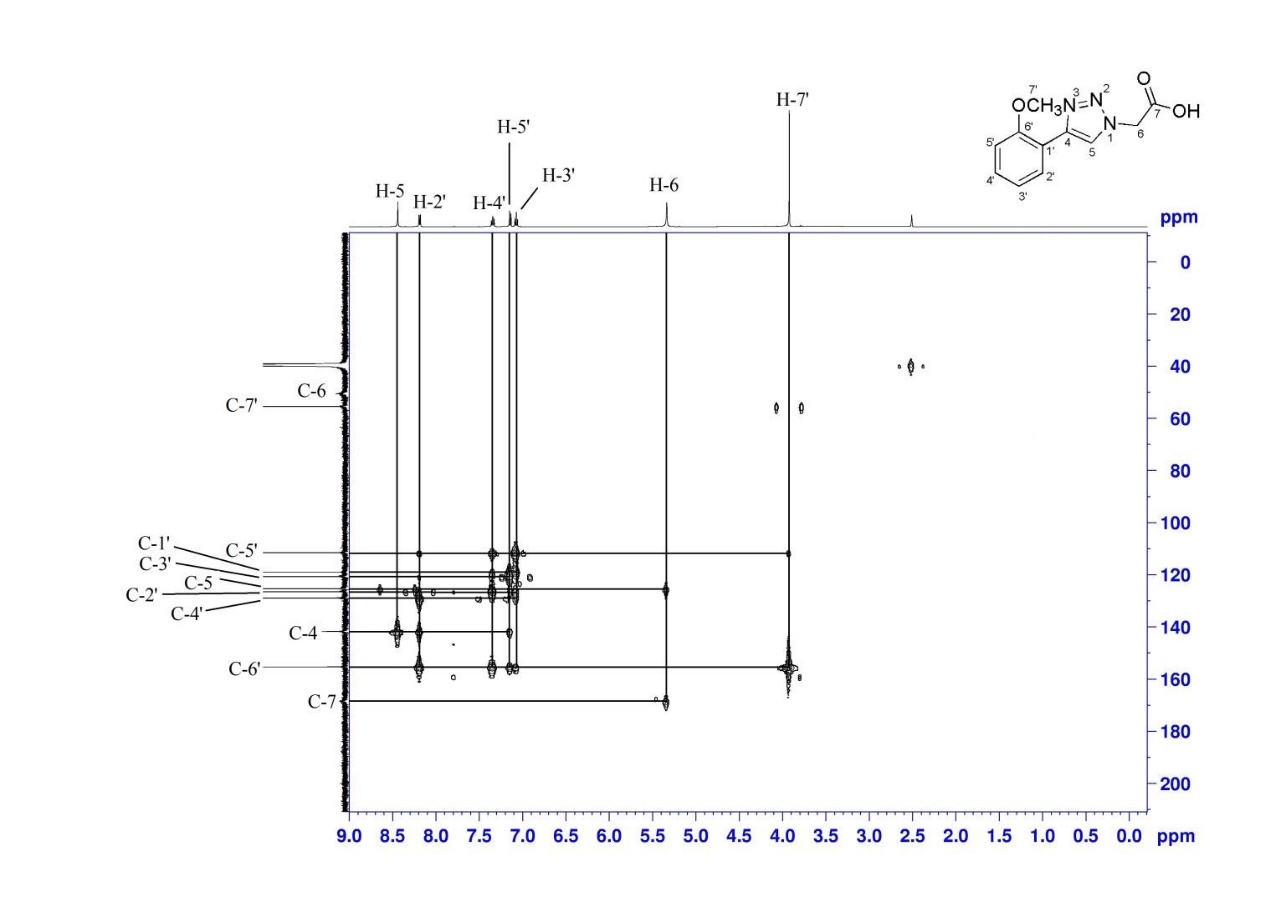


**Figure 24:** 1H -13C HMBC spectrum of compound **9** in DMSO-*d*6


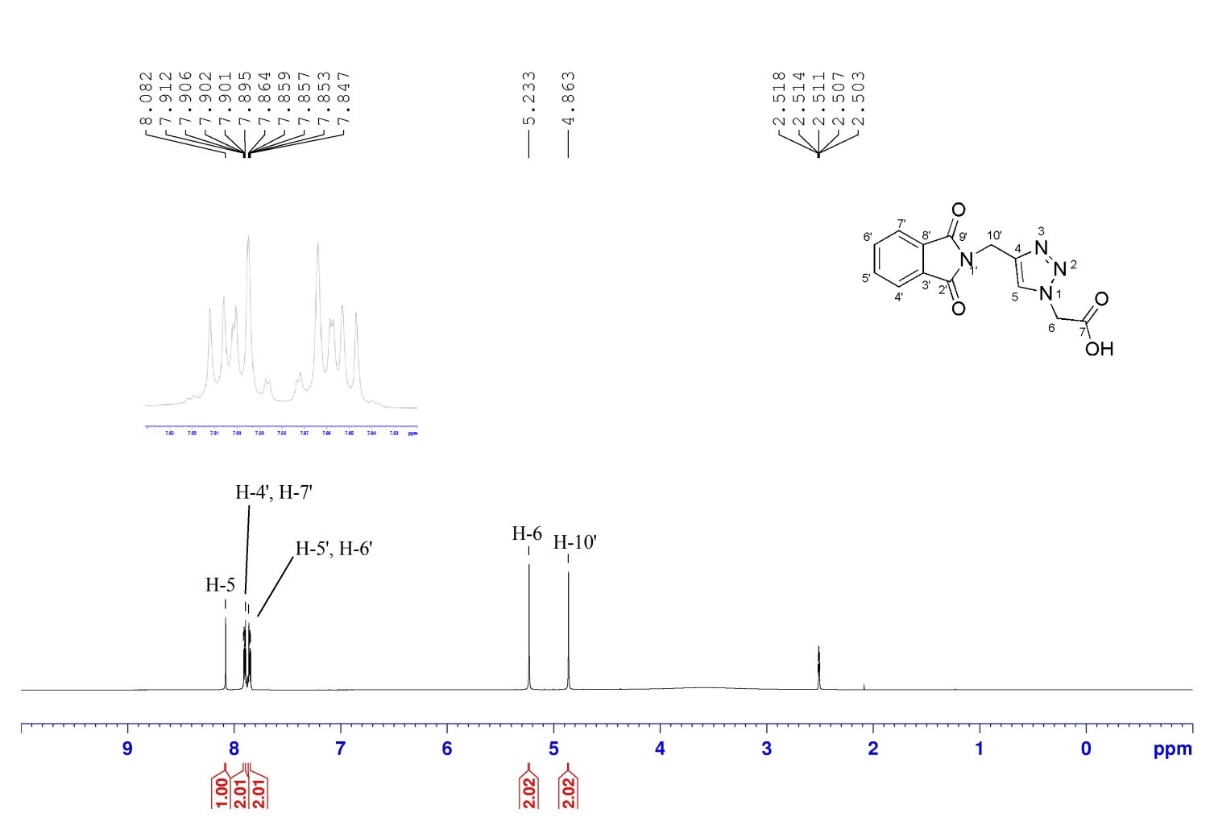


**Figure 25:** 1H NMR spectrum of compound **11** in DMSO-*d*6


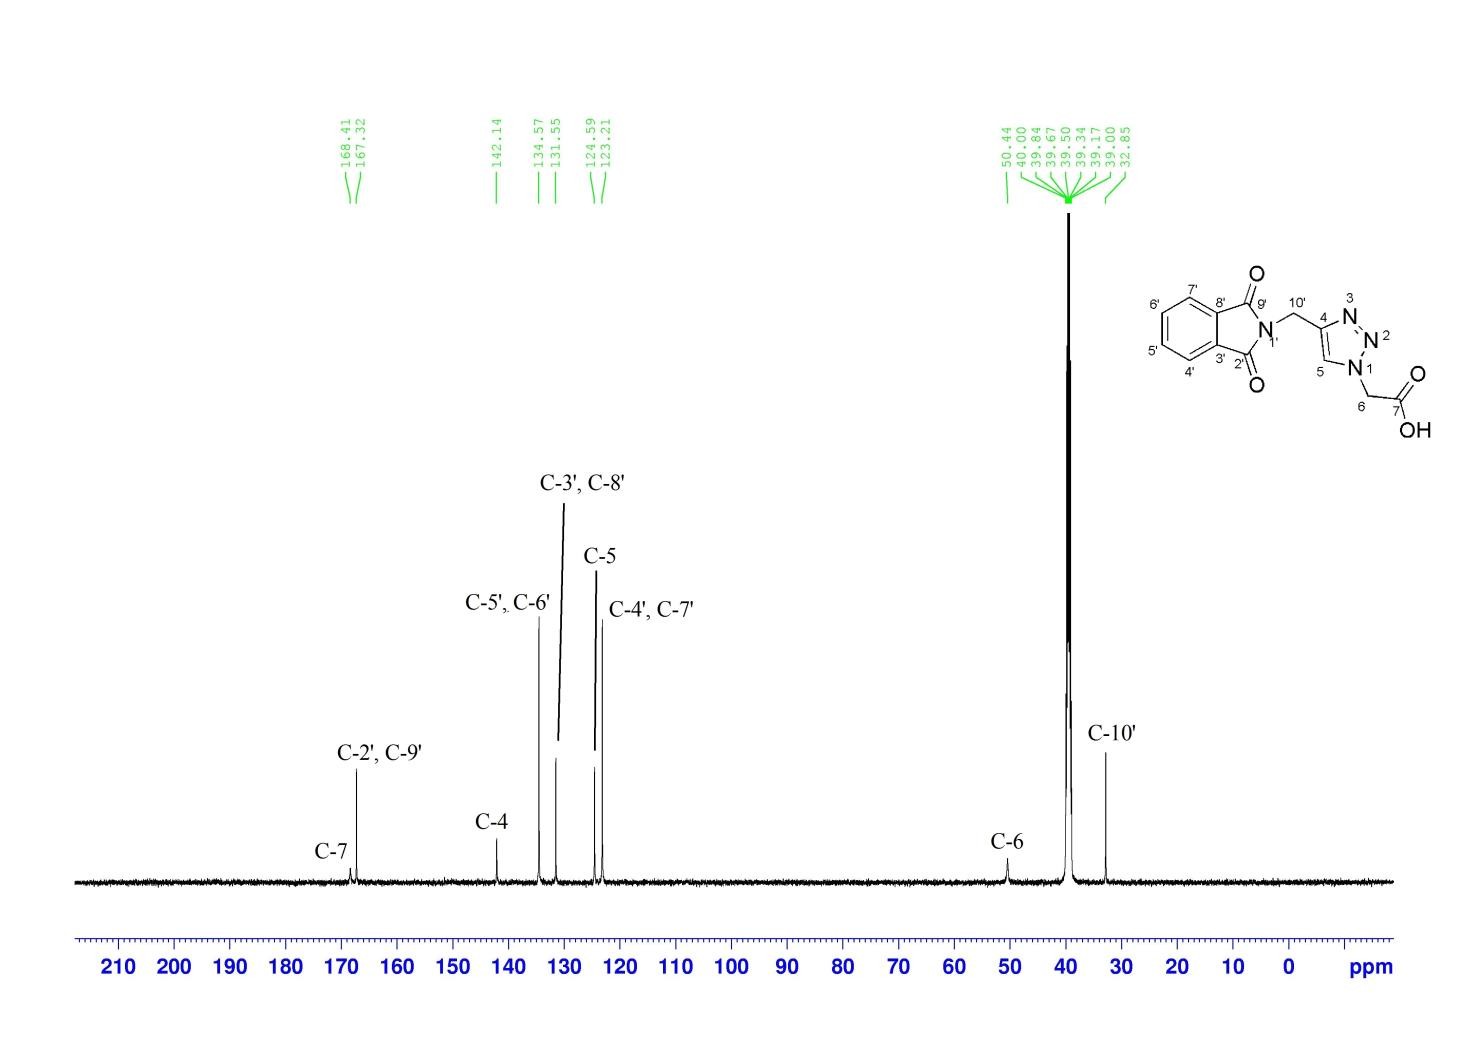


**Figure 26:** 13C NMR spectrum of compound **11** in DMSO-*d*6


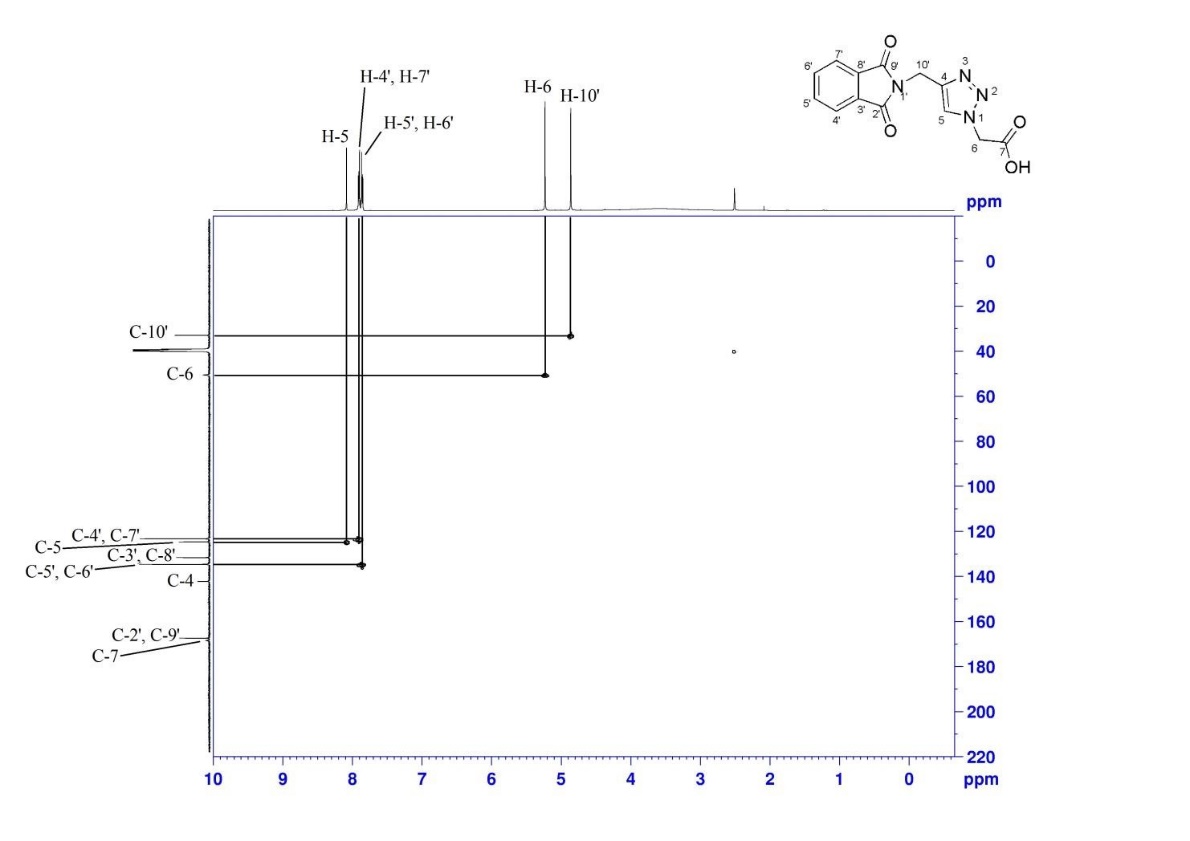


**Figure 27:** 1H -13C HSQC spectrum of compound **11** in DMSO-*d*6


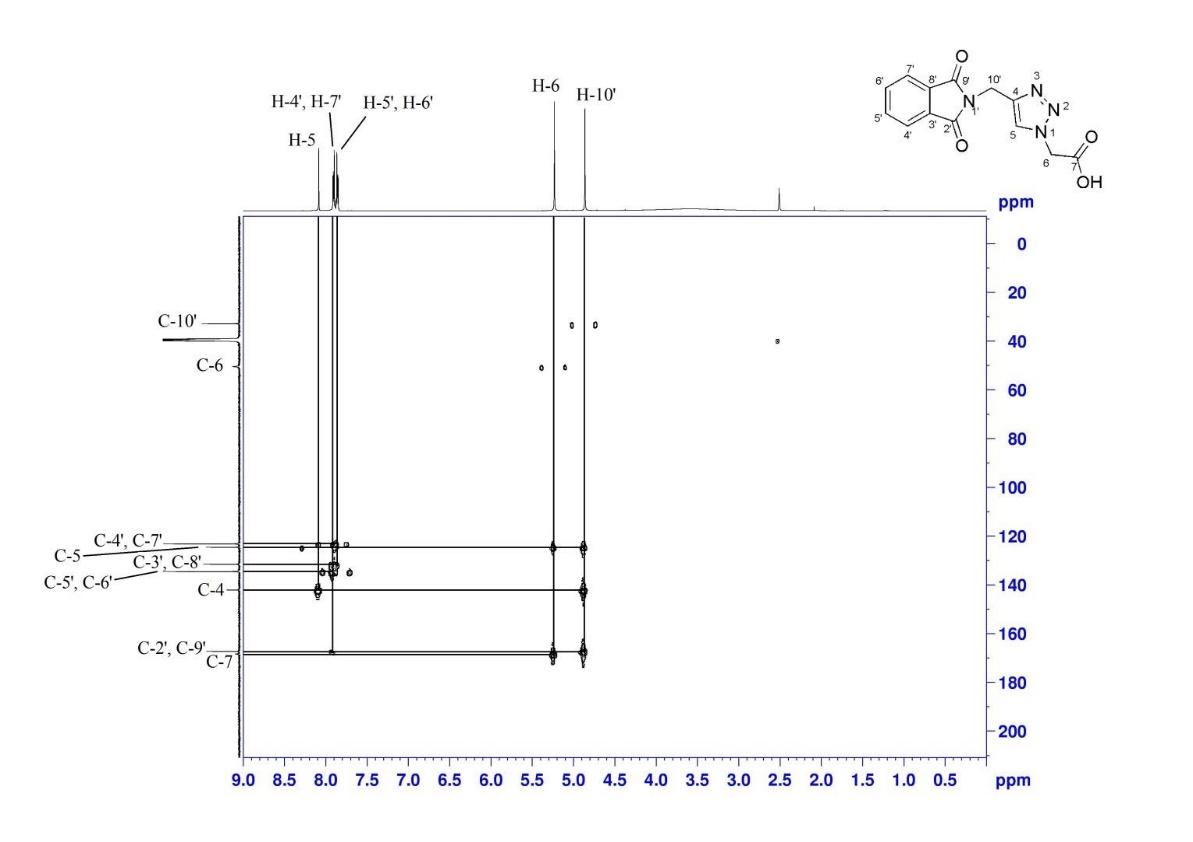


**Figure 28:** 1H -13C HMBC spectrum of compound **11** in DMSO-*d*6

**
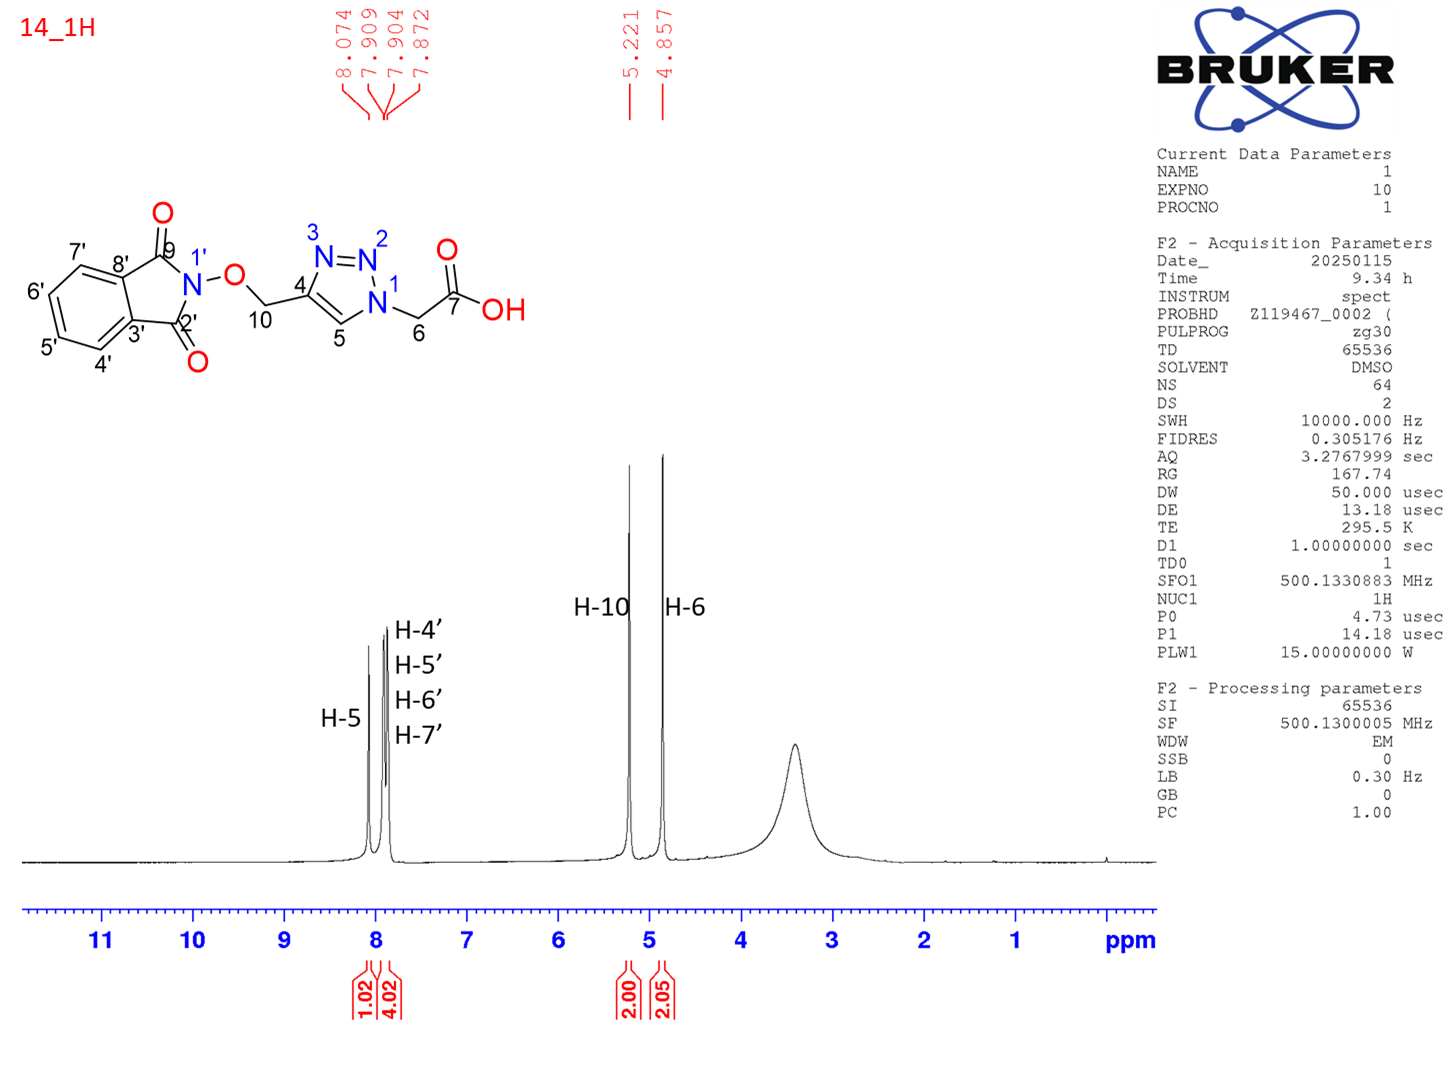
**

**Figure 29:** 1H NMR spectrum of compound **14** in DMSO-*d*6

**
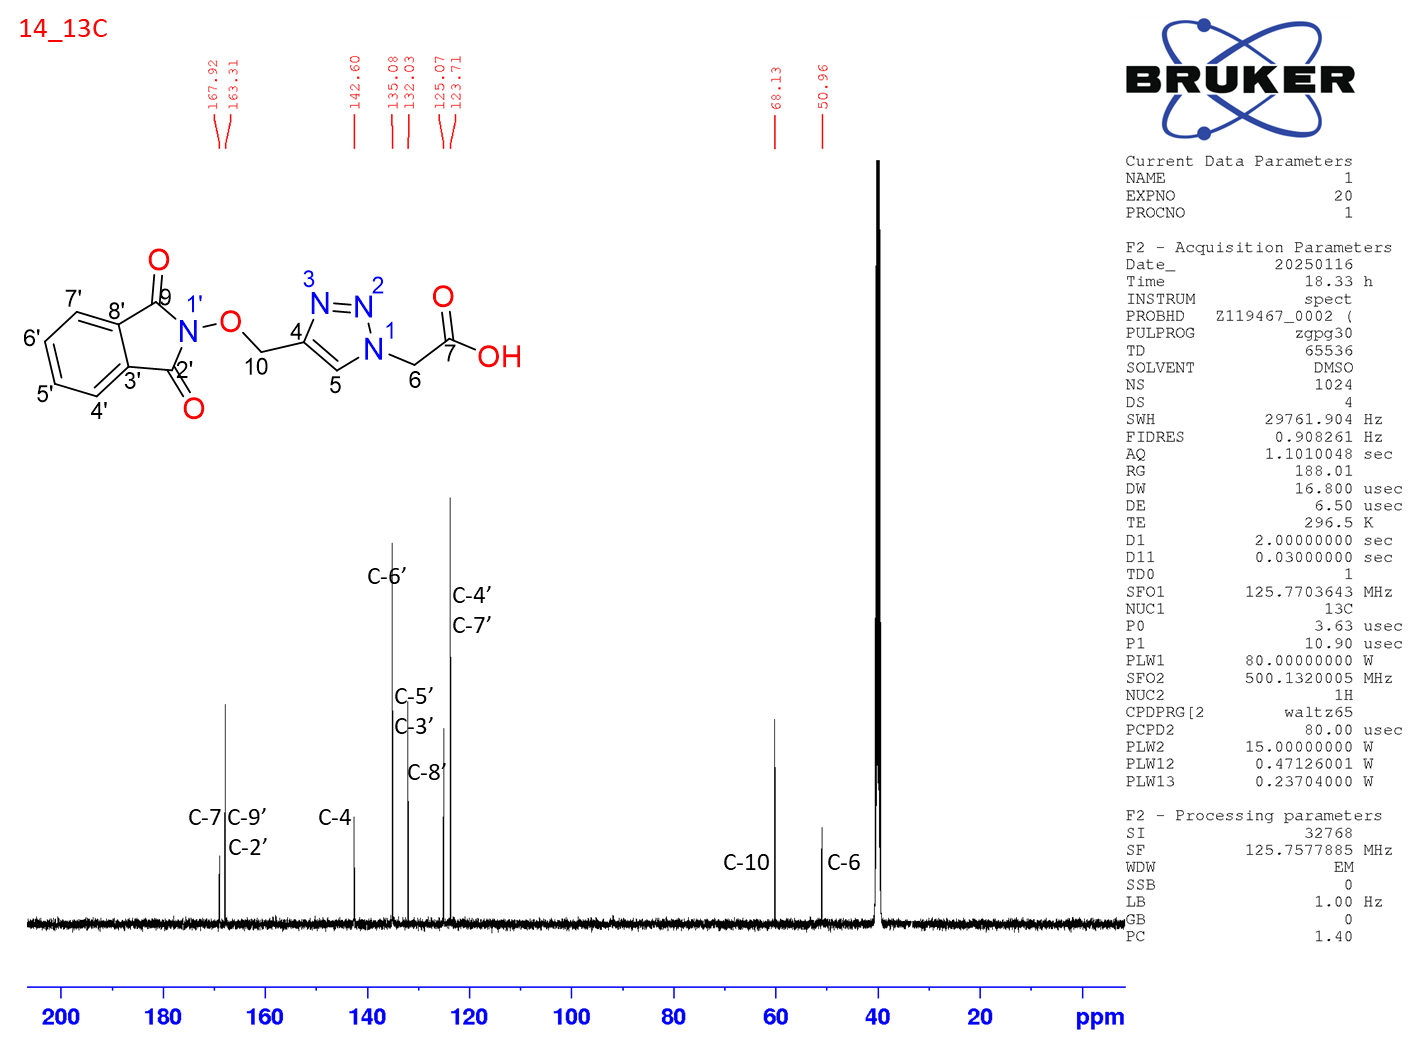
**

**Figure 30:** 13C NMR spectrum of compound **14** in DMSO-*d*6
